# Supplementary material for: Reporting Guidelines to Increase the Reproducibility and Comparability of Research on Microplastics
Source: PubMed Central journal article supplement — Appl Spectrosc. 2020 Jun 12;74(9):1066–77. doi: 10.1177/0003702820930292 (PMC8216484; doi:10.1177/0003702820930292), 2020-06-12
Supplement: NIHMS1701341-supplement-Cowger_et_al_SI_1_Detailed_Document.pdf [file NIHMS1701341-supplement-Cowger_et_al_SI_1_Detailed_Document.pdf]

# Reporting guidelines for microplastic research: Detailed Document

## Authors:

Win Cowger\*, Andy M. Booth, Bonnie M. Hamilton, Clara Thaysen, Sebastian Primpke, Keenan Munno, Amy L. Lusher, Alexandre Dehaut, Vitor P. Vaz, Max Liboiron, Lisa I. Devriese, Ludovic Hermabessiere, Chelsea Rochman, Samantha N. Athey, Jennifer M. Lynch, Hannah De Frond, Andrew Gray, Oliver A.H. Jones, Susanne Brander, Clare Steele, Shelly Moore, Alterra Sanchez, Holly Nel.

**Corresponding Author: Win Cowger; [wincowger@gmail.com](mailto:wincowger@gmail.com)**

## How to use:

This document outlines the essential elements to report about microplastic research methods to make them reproducible and comparable. This attempts to cover most of the common methods in the field but some methods have not been covered and researchers will need to develop their own guidelines for those. Groups of methods are in bold. To use these guidelines, first assess which groups of methods apply to your study. Next, assess which of the subgroups (tab separated to indicate more detailed levels of grouping) apply to your study. These can be highlighted for easy reference. At the level of the most detailed subgroups that apply to your study, all italicized criteria must be defined, described, or discussed for the method to be reproducible and comparable. Descriptions follow each reporting requirement in gray. All criteria always apply to groups that do not have subgroups. When units are given, they are examples not prescriptive. Whenever “i.e.” is used we think that all of the stated components are important to report. Guidelines indicated with an asterisk (\*) were recommended during the review process and added. All other guidelines were voted on by at least a majority (51%) of coauthors of this document. Finally, we recognize that these guidelines should not be the sole criteria for determining what is suitable for publication, but should be a tool used to help reporting methods in publications improve in general.

## Table of Contents

|                                                             |    |
|-------------------------------------------------------------|----|
| <u>Reporting guidelines for microplastic research</u> ..... | 1  |
| <u>Authors:</u> .....                                       | 1  |
| <u>How to use:</u> .....                                    | 1  |
| <u>Components to Report in All Procedures</u> .....         | 2  |
| <u>materials</u> .....                                      | 2  |
| <u>quality assurance/quality control</u> .....              | 3  |
| <u>data reporting</u> .....                                 | 5  |
| <u>Field Sampling</u> .....                                 | 5  |
| <u>Sample Preparation</u> .....                             | 7  |
| <u>Microplastic Identification</u> .....                    | 9  |
| <u>Microplastic Categorization</u> .....                    | 13 |
| <u>Microplastic Quantification</u> .....                    | 14 |
| <u>Toxicology Considerations</u> .....                      | 14 |
| <u>Disclaimer:</u> .....                                    | 16 |
| <u>References:</u> .....                                    | 16 |

## Components to Report in All Procedures

### materials

#### ***all manufacturers of materials and instruments and their calibration***

The suppliers of instruments, labware, consumables, and chemicals (e.g. dyes, digestion materials, density separation salts) used should be clearly reported. For instruments, the model and manufacturer should be stated. For general labware, relevant material properties (glass, plastic, other etc) and sizes/volumes should be clearly defined, and the supplier stated. Where relevant, quantities of consumables used should be specified. Many types of calibration are mandatory for normal functioning of the instrument. For example, laser alignment can change over time in an Fourier-transformed infrared (FTIR) or Raman spectroscopy instrument. The lasers must be aligned so that the peaks are not shifted (e.g. a peak for silicon should appear at  $520.7\text{ cm}^{-1}$  on the Raman shift) and the intensity of the peak should be within an acceptable range to produce quality spectra with an acceptable signal to noise ratio. Calibration is necessary to ensure that spectra can be compared to other spectra obtained on a different instrument in order to be independent of instrument-specific artefacts. Examples: (Oßmann et al. 2018)

### ***all software used and their calibration***

Software can have different analysis steps and assumptions built into their functioning and when the software is proprietary, these steps may be unknown. Software is used with most analytical sampling instruments and statistical analyses and should be stated as the name of the software. Any tuning parameters specific to the software should also be described. Examples: (S. Primpke et al. 2017)

## quality assurance/quality control

### **error propagation**

#### ***how instrumental, methodological, and/or statistical error was propagated***

Many types of error and uncertainty can be calculated and propagating this error typically requires detailed steps which should be described. Examples: (Hurley, Woodward, and Rothwell 2018; Kedzierski et al. 2019; Haave et al. 2019)

### **replicates**

#### ***number of replicates***

Replication is how variability is calculated and accounted for. The number of replicates determines the interpretation of the accuracy of the measurements. Therefore the number of replicates should always be reported. Examples: (Cable et al. 2017)

#### ***how replicates were nested within samples***

The scale of replication can be nested to allow for calculating the variability at multiple levels. For example a field sample could be replicated at a certain time or in a specific location to measure the variability or compare variables. Examples: (Frias, Sobral, and Ferreira 2010)

### **limit of detection**

#### ***quantitative detection threshold***

The percent, count, mass, or volume of plastics that a given method is able to detect is a central metric for assessing the error of a method. This can be calculated using blank and positive controls described below or based on the instrument specifications. The quantitative detection threshold of plastics should be reported in its least aggregated form by describing the quantity for shape, size, polymer, and/or color categories. Examples: (Martin et al. 2018)

#### ***plastic morphology, size, color, and polymer limitations of method***

All analytical methods have limitations based on morphology, size, color, and/or polymers. Plastics, particularly at the microscale, can be mistaken for non-plastics and vice versa. There can be substantial contamination from certain shapes (e.g. fibers, (McNeish et al. 2018)). (M. Liboiron et al. 2016) and (Song et al. 2015) found that visual identification with a microscope became unreliable for plastics under 1 mm in size. Based on transparency some plastics may not be visible using visual methods. Based on the color of some contamination sources, a study may exclude a whole group of colored particles. Some polymers like Polytetrafluoroethylene (PTFE) ( $2.2 \text{ g ml}^{-1}$ ) may be more dense than density separation procedures and other polymers may be vulnerable to some digestion procedures (Enders et al. 2017). These considerations warrant specific discussion of method limitations based on shape, size, color, and polymer. Examples: (Nel et al. 2019; Hermabessiere et al. 2018; Dehaut, Hermabessiere, and Duflos 2019; Lorenz et al. 2019; Devriese et al. 2015; Vandermeersch et al. 2015; Hendrickson, Minor, and Schreiner 2018)

#### ***method of accounting for nondetects***

Nondetects are measurements which are below the limit of detection. Non-detects can be handled with appropriate statistical testing (Helsel 2006). There are many different methods, so the method used should be described. Examples: (Brander, submitted)

## **blank controls**

### ***number of controls***

It is important to know that the number of controls determines the measurement of uncertainty of the control results. Examples: (Hermesen et al. 2018; Dehaut, Hermabessiere, and Duflos 2019)

### ***characteristics of plastics found in blanks with same rigor as samples***

Controls are often used to correct the full results. Characterizing controls with the same rigor as the samples allows for a complete comparison between control and sample results. Examples: (McNeish et al. 2018)

### ***potential sources of contamination***

It is important to discuss what may have contributed to any contamination in the field or lab for interpretation of results. This includes but is not limited to the types of clothing/safety vests worn by field and lab personnel, the lack of air filtration systems, or the proximity to chairs, carpet, curtains or other sources. Examples: (Miller et al. 2017)

### ***blank correction procedure***

In blank correction, the value observed in blanks is removed from the value counted in samples taking into account multiple variables for a thorough correction (Dehaut et al. 2019). Some common procedures are subtraction, mean value subtraction, and comparisons of distributions in blanks and samples. These procedures are not standardized and should be described. Examples: (Miller et al. 2017)

### ***point of entry and exit to method***

If a blank sample is a field blank, it enters the method workflow in the field. If it is a lab blank, it enters the method in the lab. Exit point is the time and location that the sample was quantified (e.g. “blanks were quantified at the same time and location as the sample was.”) Examples: (Miller et al. 2017)

## **positive controls**

### ***morphology, size, color, and polymer type of positive controls***

The recovery efficiency of a positive control determines the bias of the method. Factors that can affect recovery and interpretation of results are morphology, size, color, and polymer type. Examples: (Dehaut, Hermabessiere, and Duflos 2019; Hermesen et al. 2018; Dehaut et al. 2016)

### ***positive control correction procedure***

Take the results of positive controls into account to discuss the performance of the methods. In positive control correction, the loss or gain value observed in positive controls is removed from the value counted in samples taking into account multiple variables for a thorough correction. Some common procedures are subtraction, mean value subtraction, and comparisons of distributions in controls and samples. These procedures are not standardized and should be described. Examples: (Hermesen et al. 2018; Dehaut et al. 2016)

### ***point of entry and exit to method***

If a positive sample is a field control, it enters the method workflow in the field. If it is a lab control, it enters the method in the lab. Exit point is the time and location that the sample was quantified, (e.g. “controls were quantified at the same time and location as the sample was.”) Examples: (Dehaut et al. 2016)

## **contamination mitigation**

### ***clothing policies***

Contamination in samples can come from clothing and gloves (Dehaut, Hermabessiere, and Duflos 2019). The material of clothing in the field and lab should be described.

Examples: (Van Cauwenberghe and Janssen 2014).

***purification technique for reagents***

There is no microplastic-free standard solution available on the market (Dehaut, Hermabessiere, and Duflos 2019). Reagent producers are not familiar with microplastic contamination and atmosphere in production facilities plants can contain microplastics. It is important to filter all used reagents. The degree of filtration determines the degree of potential contamination and the method for filtering reagents should be reported. Examples: (De Witte et al. 2014; Lorenz et al. 2019)

***glassware cleaning techniques***

Glassware can adsorb microplastics particles which contaminate samples. Muffling, thermal destruction of microplastics, can be used to treat glassware (500°C) but may be limited to small glassware. Rinsing - using filtered reverse osmosis or Milli-Q water can also be employed to remove residual microplastic particles before use. Whatever method is used it should be thoroughly described. Examples: (Tanaka and Takada 2016)

***containment used (e.g. laminar flow cabinet/hoods, glove bags)***

Containment devices like laminar flow hoods, glove bags and other enclosed devices decrease contamination. Without containment, small fragments and fibers can contaminate the samples (Wesch et al. 2017; Lorenz et al. 2019). Not all containment devices have the same capabilities (Wesch et al. 2017), it is thus very important to use and describe containment devices used to physically protect samples from particles.

Examples: (Claessens et al. 2013; Torre et al. 2016; Dehaut, Hermabessiere, and Duflos 2019; Lorenz et al. 2019)

## data reporting

***share raw data and analysis code as often as possible***

Raw data is data in its least aggregated form. The level of aggregation typically depends on the methods used and as a general rule, the data recorded onto a field or lab sheet or files created from an instrument will be the rawest form of data possible. Raw data can allow for the reverse engineering of methods and improve the ease of comparability.

Analysis code records all analysis steps and makes method reporting simpler. Raw data and analysis code should be shared with all publications. Examples: (S. Primpke, Dias, and Gerdts 2019; Cabernard et al. 2018; Sebastian Primpke et al. 2018; S. Primpke et al. 2017)

## Field Sampling

***where (e.g. region) and when (e.g. date, time) the sample was collected***

Location determines the ecology, geology, climate, geopolitical standing, and socio-economic setting of the sample. The location where field samples are collected can be expressed using latitude and longitude or other coordinates with coordinate system reference datum and a map (Bagaev et al. 2017). Research has shown that different seasons (Spear, Ainley, and Ribic 1995; Cheung, Cheung, and Fok 2016), weather such as storms (Lattin et al. 2004), wind (Browne, Galloway, and Thompson 2010), time between repetition of sampling (Smith and Markic 2013), and other time- and date-dependent factors affect plastic distribution and types. This is as true for shoreline, benthic, and water sampling where particle movements are influenced by the weather. In biotic sampling seasons, time of day and other factors affect feeding behaviour. Noting these trends is important for understanding environmental relationships. The date and time of sample collection should

be recorded, including information on seasons, during data collection. When time is reported, a standardised format should be used, such as UTC (Coordinated Universal Time) or include the time zone and information about how the date is recorded. This data can be correlated with season, weather events, tides, and other time-based factors. For example, (Cheung, Cheung, and Fok 2016) found high seasonal variance between wet and dry seasons in microplastics concentrations in the estuary of a subtropical macro-scale drainage basin in South China, to the degree that “if the mean abundance of microplastics was determined solely by winter sampling, an underestimation of 73% would occur” (Cheung, Cheung, and Fok 2016). A study by Smith and Markic on shorelines “in eastern Australia indicates that estimated daily accumulation rates [of plastics] decrease rapidly with increasing intervals between surveys, and the quantity of available debris is underestimated by 50% after only 3 days and by an order of magnitude after 1 month.” (Smith and Markic 2013). Examples: (Brander, submitted)

***size (e.g. m<sup>3</sup>, kg) and composition (e.g. sediment, water, biota) of the sample***

With increased sample size there is an increase in statistical power and certainty in interpretation. Volume and mass of many samples are typically dominated by water content. These sample size units should be described as wet or dry. Differences in sample composition could reflect the heterogeneity in plastics distribution, and the composition itself may affect the results (e.g. wet weight of silty versus sandy sediment, the fraction of suspended particulate matter, or the influence of algae blooms on the size of the plankton sample). The composition of the sample taken must be stated (e.g. sediment, water, plankton and biota (including tissue vs organ) samples). Examples: (Dehaut, Hermabessiere, and Duflos 2019; Leslie et al. 2017)

***location at the site that sample was collected (e.g. 3 cm depth of surface sediment)***

Plastic can be stratified by depth and width at intervals that are not standard across media (Willis et al. 2017). The location at the sample site where the sample was taken from, describing this typically involves describing the depth and width or area of the sample where the sample was taken within the site (e.g. the stream flow sample was taken from the stream bed to 0.5 m above the stream bed).

***sample device dimensions and deployment procedures***

Device dimensions and deployment procedures affect the sample (e.g. environmental layer, life stage) and results of microplastic detection in marine environmental samples. The mesh size of a net or sieve will determine the lower size limit of particle retention and the aperture will determine the upper limit. The width, length, height, aperture size, and mesh size of the device should be stated. How the device is deployed (e.g. from the side of the vessel vs behind the vessel, at what speed) will also affect the sample concentration and should be stated. Examples: (Hermesen et al. 2018); Mesh Size: (“Interim Report of the Working Group on Marine Litter (WGML),” 2018; Hidalgo-Ruz et al. 2012; Covernton et al. 2019) Device deployment: (Amy L. Lusher et al. 2014)

***environmental or infrastructure factors that may affect interpretation of results***

Environmental factors can greatly affect the concentrations of microplastics in field samples. Report environmental factors (e.g. winds/ocean currents) (Reisser et al. 2015) or extreme weather events (storms) associated with time samples were collected. Mention any sources of anthropogenic influence (e.g. storm drains, run-off, etc), pH, Salinity, Dissolved (in)organic content. Timing and influence of prior cleanup events. Information on the sample device positioning during sampling should be reported relative to these fluxes. Examples: (Amy L. Lusher et al. 2014; Enders et al. 2015; Hardesty et al. 2017; Iwasaki et al. 2017; Kukulka, Law, and Proskurowski 2016; Frère et al. 2017)

***how samples are stored and transported***

Transporting samples in plastic materials could contaminate the sample or create a static charge on the sample. Additionally the solution the sample is transported and stored in

could be important because formaldehyde or ethanol could lead to volume change in particles or affect the use of enzyme downstream. If samples are stored without biocide, the particles could become fouled and affect other measurements later on (Crichton et al. 2017). Rough handling of samples can lead to fragmentation of plastic particles. Examples: (Courtene-Jones et al. 2017; Dehaut, Hermabessiere, and Duflos 2019)

## Sample Preparation

### homogenization

#### ***homogenization technique***

Some homogenization techniques can break up plastic particles. Therefore it is important to report what techniques samples homogenized by (e.g. sonication with probes, agitation). Examples: (Wagner et al. 2017)

### splitting/subsetting

#### ***sample splitting/subsetting technique***

Some sample splitting and subsetting techniques introduce more error than others, and if the subsample is not representative of the whole sample, this may lead to over- or under-estimation of particle count, and/or improper particle diversity characterization. If the whole sample was not analyzed and instead was split in some way (e.g. for application in different methods), what were the parameters or techniques for splitting? Parameters include how the sample was mixed before and during splitting, what volume or proportion of the total sample was taken, whether the sample was split before filtration/isolation, or afterwards. If before, were they split by size fractionation, or some other technique? If afterwards, what area of the filter was subsampled and where. Examples: (A. L. Lusher et al. 2017)

### drying

#### ***sample drying temperature and time***

Some plastics are destroyed by high temperatures and the time of drying sets the degree of drying. Therefore, drying temperature and time are important to report. Examples: (Dekiff et al. 2014)

### synthesized plastic

#### ***synthesized plastic polymer, molecular characteristics, size, color, texture, and shape***

Microplastic reference materials (MRMs) are either purchased, synthesized or ground up from post-consumer material. MRMs may be used in method development/validation/recovery tests, as positive blanks or controls, in toxicology studies, or in studies investigating processes such as weathering, transport, settling rates and resuspension. To improve reproducibility, it is important to describe the origin of MRMs, including how they were prepared and what their physicochemical properties are. Essential parameters to report are polymer composition, particle size distribution, particle shape/morphology (spherical, irregular, fibrous, foam, film etc) and color of the particles. Where possible, the presence of any other known chemicals or materials associated with the MRM should be specified (e.g. surfactants, impurities, additive chemicals), molecular weight distribution (MWD), melt-flow-index, melting point, glass transition temperature, crystallinity, additive chemical profile (from non-target screening analysis), metal content. Reporting Examples: (Vicentini et al. 2019) characterized the plastic particles on its morphology, diameter and suspension stability as well as performed toxicity assays with the synthesized particles. (Wang et al. 2017) quantified the concentrations of depolymerized building block compounds such as bisphenol A (BPA) and para-phthalic acid (PTA). The polycarbonate (PC) and PET MPs concentrations in the

environmental samples from an activated sludge reactor were estimated by comparing the samples with BPA and PTA chromatographs.

#### ***synthesized plastic synthesis technique***

If the polymers were synthesized in-house, what techniques, glassware/reactors, chemicals, reactions, and additives were used? A brief description of the techniques used, chemicals used and their function on the reaction, proceedings and any other details that may be related to the synthesis process. If the material is synthesised or produced by milling (or similar), method details should be clearly described. The synthesis technique may describe potential reactions and aid in listing excipients as possible alterations for the toxicity. Reporting Examples: (Lu, Qu, and Forcada 2009) reported the whole detailed technique for synthesis and (Vicentini et al. 2019) reported the methodological adaptations for the same synthesis elaborated by (Lu, Qu, and Forcada 2009).

#### **fluorescent dye**

##### ***dye type, concentration, and solvent used***

Fluorescent dyes can be used for the selective staining of common polymers, aiding in sample sorting and speeding object identification for spectroscopy. Different dyes have different fluorescent properties. Dye concentration determines the extent of stain and background fluorescence. Solvents have a variety of solubilities for the dye and some solvents can dissolve some plastic. Describe what solvent (e.g. acetone, hexane, n-propanol) was used to make the Nile red stock solution. Examples: (Karakolis et al. 2019; Wiggin and Holland 2019; Maes, Van der Meulen, et al. 2017)

##### ***dye application technique***

If dye is applied before some steps (like digestion) there could be reduced fluorescence. This will affect the fluorescence intensity and the chance of false positives and false negatives. Therefore, explain how and when was the microplastics exposed to the stain (e.g. dilution, directly). Describe the incubation conditions (e.g. concentration, temperature, duration) of the plastics and dye solution. Examples: (Karakolis et al. 2019)

#### **sieving strategy**

##### ***sieve mesh size***

Sieve mesh size sets the smallest diameter of the particle extracted. Examples: (Wagner et al. 2017)

##### ***if sample was wet or dry sieved***

Wet sieving and dry sieving typically have different separation efficiencies because particles may be left behind in the sieve. Therefore, whether the sieving was done wet or dry is important to report. Reporting Examples: (Wagner et al. 2017)

#### **density separation**

##### ***concentration, density, and composition (e.g. CaCl<sub>2</sub>, ZnCl) of solution***

Depending on the density used for separation some polymer types of plastics might not be completely separated. The concentration of the salt in mass per volume of the solution used in density separation should be stated. The target, estimated, or measured density of the solution should also be stated. Concentration and density, while possibly sharing the same units (g/mL) are different measurements and both should be reported. For example, a 30% solution of NaCl is 30 g of NaCl per 100 mL of liquid and the density is the total mass of the combined solution divided by its volume. Salts can react with the matrix in many ways and salts adhered to the surface of the plastic can influence spectral interpretation. Therefore, report the type of salt used to create the high-density fluid and methods used to remove the salts from the isolated microplastics. In (Ivleva, Wiesheu, and Niessner 2017), an example graph shows the different limitations of separation fluids. Examples: (Crichton et al. 2017; Mani et al. 2019)

##### ***time of separation***



Separation efficiency is a function of time with increases in time generally increasing separation efficiency. The duration of separation or settling should be specified.

Examples: (Imhof et al. 2012)

#### **device used**

Devices have different recovery rates and particle size limitations. Describe the device used for density separation (e.g. flotation & supernatant filtration) (Thompson et al. 2004), elutriation (Claessens et al. 2013), sediment fluidization (Wessel et al. 2016), froth flotation (Imhof et al. 2012), separation funnel (Masura et al. 2015). Examples: "Sediment-Microplastic Isolation unit" (Coppock et al. 2017). "Munich Plastic Sediment Separator (MPSS)" (Imhof et al. 2012).

### **digestion**

#### **duration and temperature of digestion**

Duration and temperature combination can have different deleterious effects on plastics (Munno et al. 2018; Thiele, Hudson, and Russell 2019). Duration (using a clear format (e.g. hours)) and temperature of incubation (°C) should be stated. Examples: (Thiele, Hudson, and Russell 2019; A. Lusher, submitted)

#### **digestion solution composition**

Some chemicals can alter plastic by changing their color or destroy them (Dehaut et al. 2016). Composition of the digestion solution along with its concentration must be provided when used. Examples: (Thiele, Hudson, and Russell 2019; A. Lusher, submitted)

#### **ratio of digestion fluid to sample**

Digestion efficiency can present opposite results even if used with the same concentration, incubation temperature and duration but with a different ratio of chemical per mass of sample (Comparison between (Dehaut et al. 2016) and (von Friesen et al. 2019). When higher ratios of digestion fluid to sample are used, there is a higher ability for that sample to be degraded by the solution. This ratio can be provided as a volume of solution per mass of sample (ml g<sup>-1</sup> for example) or volume of solution per volume of sample. Either way, these units should be described. Examples: (Thiele, Hudson, and Russell 2019; A. Lusher, submitted)

### **filtration**

#### **filter composition, porosity, diameter**

Filter composition can have an impact on background signal if Raman or FTIR are used to identify microplastic (Oßmann et al. 2017; Löder and Gerdt 2015). Filter integrity can be compromised by incompatibility with chemicals in the sample. Filter porosity will influence the smallest size of microplastic recovered and filter diameter influences maximum surface area for particles to concentrate. Filter composition, porosity, and diameter should be provided. Example: (Lorenz et al. 2019)

## **Microplastic Identification**

### **visual identification**

#### **imaging settings**

##### **image settings (e.g. contrast, gain, saturation, light intensity)**

The settings for the light influence the interpretation of the colors and shininess of objects should be specified when reproducing an image is important for reproducing results of a study. Examples: (Cowger, submitted)

##### **magnification (e.g. scale bar, 50X objective)**

Interpretation of plastic size depends on the magnification of the image. Include scale bars in all images generated and describe magnification used during assessment.

Examples: (Fries et al. 2013)

## **light microscopy**

### ***magnification used during identification***

The limit of detection based on size depends on the magnification used to identify particles. Examples: (Wiggin and Holland 2019).

### ***shapes, colors, textures, and reflectance, used to differentiate plastic***

These factors determine the cutoffs used to distinguish a positive identification of plastics. Examples: (Murray and Cowie 2011; Rowshyra A. Castañeda, Suncica Avlijas, M. Anouk Simard, Anthony Ricciardia 2014; Fries et al. 2013).

## **fluorescence microscopy**

### ***magnification used during identification***

The limit of detection based on size depends on the magnification used to identify particles. Examples: (Wiggin and Holland 2019).

### ***fluorescence light wavelength, intensity, and exposure time to light source***

The wavelength of excitation light and the intensity determines the fluorescence emission intensity and wavelength (Wiggin and Holland 2019; Erni-Cassola et al. 2017; Maes, Jessop, et al. 2017). Additionally, some fluorescence pigments undergo photobleaching which will decrease their intensity over time when exposed to a light source (Karakolis et al. 2019).

### ***threshold intensity used to identify plastic***

The threshold intensity is an arbitrary unit that defines the cutoff range of intensities that result in a positive plastic identification. This range should be described as well as the maximum and minimum intensity values in the analyzed samples. Examples: (Erni-Cassola et al. 2017)

## **scanning electron microscopy (SEM)**

### ***coating used (e.g. metal type, water vapour)***

The coating changes the quality of the SEM image, the conductivity of the sample, and the Energy Dispersive X-Ray Spectroscopy (EDS) measurement if an EDS measurement is taken. Additionally, the gas pressure/vapor content needs to be reported for similar reasons. Examples: (Zbyszewski, Corcoran, and Hockin 2014)

### ***magnification used during identification***

The limit of detection based on size depends on the magnification used to identify particles. Examples: (Zbyszewski, Corcoran, and Hockin 2014)

### ***textures used to differentiate plastic***

SEM is commonly used to describe microplastic textures, these textures should be described with images provided for reference where possible. Examples: (Zbyszewski, Corcoran, and Hockin 2014)

## **chemical identification**

### **pyrolysis gas chromatography mass spectrometry (py-GC/MS)**

#### ***pyrolysis reacting gases, temperature, duration***

Pyrolysis temperature (in °C) and duration (in s or min) for identification using this technique should be clearly reported as those two parameters can influence the degradation products formation and then influence polymer identification (Hermabessiere et al. 2018). In addition, if thermochemolysis is realized, the volume and concentration of the chemical should be reported. Example: (Fischer and Scholz-Böttcher 2017)

#### ***GC oven program, temperature, carrier gas, and column characteristics***

All parameters related to the GC separation parameters including GC oven temperature program (temperature ramp rates and hold durations), interface temperature, injection port temperature, split ratio, column characteristic (length, diameter, thickness, phase, manufacturer), gas carrier and its velocity must be reported as those parameters are mandatory to reproduce GC analyses (Hermabessiere et al. 2018). Information too extensive for the material & methods section can be reported in the form of a table in the supplementary material. Examples: (Fischer and Scholz-Böttcher 2017)

***MS ionization voltage, mass range, scanning frequency, temperature***

All parameters related to the MS acquisition parameters including interface temperature, ion source type, ion source temperature, ionization voltage, mass range, and scanning frequency must be reported to allow reproducible MS data between studies (Hermabessiere et al. 2018). Information too extensive for the material & methods section can be reported in the form of a table in the supplementary material (Cowger, submitted)

***py-GC/MS matching criteria (i.e. match threshold, linear retention indices (LRI), and Kovats index)***

Plastic identification after py-GC/MS can be done using two techniques. First, the average mass spectrum is sent to a software where comparison is made between the spectrum and a library. For this purpose, the software name and supplier in addition with the library name and origin (supplier or homebase) should be reported. The minimum matching threshold (e.g. 80%) should be also given (Hermabessiere et al. 2018). Secondly, identification can be made by comparing characteristic peaks of a pyrogram with the available literature. LRI and Kovats index should be used instead of the retention time as this metric can be used to compare across laboratories (van Den Dool and Dec. Kratz 1963).

***py-GC/MS quantification techniques***

If quantification of plastic is performed with py-GC/MS, several other pieces of information should be provided. Particular attention should be given to quality control and assurance, including lab blanks and matrix-matched positive controls. Which quantification approach (external standard, internal standard, or standard addition) used should be described. The source of the calibration materials, concentrations, and how and when they were handled and tested need to be included. Indicate which characteristic peak of a polymer was used to perform the quantification. This characteristic peak must be specific to the polymer and present in relative abundance. Calibration curve and equation must be provided in the results section in order to evaluate any interference issues with the samples (Fischer and Scholz-Böttcher 2017).

**raman spectroscopy**

***acquisition parameters (i.e. laser wavelength, hole diameter, spectral resolution, laser intensity, number of accumulations, time of spectral acquisition)***

Laser wavelength determines the likelihood of interference from fluorescence and should be reported in nm. The hole diameter and slit width ( $\mu\text{m}$ ) can also affect the spectral resolution of the spectrum. Spectral resolution can change the peak shape and intensities observed and should be reported as the step size of the resolution. Spectral resolution is calculated using laser wavelength (nm), grating (grooves/mm), and charge-coupled device (CCD) size (pixels). Spectral resolution may be used to determine appropriate settings to use with instruments from various manufacturers in order to achieve comparable spectra among differing instrumentation. The intensity of the laser can be adapted to higher or lower values to improve the quality of the spectrum (Cabernard et al. 2018). The maximum laser power of the instrument should be reported (in mW) to provide context to the laser intensity used to collect spectra. The laser intensity may be reported as a filter (%) of maximum laser power. Multiple spectra

are averaged by a predetermined number of accumulations, and increasing the number of averaged spectra may improve the quality of the final spectrum. Increasing spectral acquisition time may improve the quality of the spectrum by increasing the signal or aid in mitigating fluorescence; however, increased time may also lead to photodegradation of the sample. A delay time may also be added to mitigate fluorescence (Munno et al. 2020). Additional spectral acquisition times can destroy samples or improve the signal. As a good practice, a record of the parameters used should be stored (e.g. spectrum metadata) in case the spectrum must be produced again from the same particle and instrument. Examples: (Lenz et al. 2015; Karami et al. 2018; Cabernard et al. 2018; Oßmann et al. 2018; Käßpler et al. 2016; Collard et al. 2015; Munno et al. 2020)

***pre-processing parameters (i.e. spike filter, smoothing, baseline correction, data transformation)***

A spike filter can remove small window peaks. Smoothing parameters can smooth out peak signals. Baseline correction and data transformations can warp the peak signals in many ways. Data transformations can change the peak shape. Therefore, these factors need to be rigorously described. Depending on the software used, the type and degree of baseline correction, smoothing and data transformation may be automatic, and may vary from spectrum to spectrum. A range of possible pre-processing parameters may be reported if the parameters vary. For spectra processed in batches, or for automated and semi-automated methods, the specific pre-processing parameters should be reported. Examples: (Lenz et al. 2015) (baseline correction, smoothing, normalization), (Ghosal et al. 2017; Collard et al. 2015; Dehaut et al. 2016)

***spectral matching parameters (i.e. spectral library source, range of spectral wavelengths used to match, match threshold, matching procedure)***

Spectral reference databases can affect the accuracy of spectral matching and results. Discuss whether the libraries are made in house or purchased, and if the libraries are specific to only polymers or include other chemicals. Matches can only be made to available entries in the library. State whether the libraries include spectra for environmentally aged and degraded polymers. Examples: (Käßpler et al. 2016; Karami et al. 2016; Cabernard et al. 2018; Munno et al. 2020). When using Raman spectroscopy for polymer identification, many characteristic polymer peaks occur within the 100 – 3500  $\text{cm}^{-1}$  range (Smith and Markic 2013). It is important to report the range of wavenumbers included for spectral matching purposes. Some portions of the range are more susceptible to masking by other substances (e.g. pigments masking polymer peaks in the fingerprint region) (Lenz et al. 2015). The range affects which peaks will be described. For example, (Oßmann et al. 2018) found that for Raman spectroscopy analysis, values larger 2000  $\text{cm}^{-1}$  can be excluded for a successful analysis. Examples: (Oßmann et al. 2018; Collard et al. 2015; Käßpler et al. 2016; Cabernard et al. 2018) The minimum threshold for a 'successful match' may impact the likelihood of assigning an incorrect match or matching only one component of a multi-component polymer (e.g. a copolymer or a polymer and pigment/additive combination). (Munno et al. 2020) observed a relatively high proportion of spectra identifying only pigments that were considered successful matches prior to the creation of a microplastics specific reference database. Minimum matching threshold creates the cut-off point of what is accepted as a 'good match'. (Lorenz et al. 2019) did a large reanalysis of the determined matches for a minimum threshold for different polymer types. (Cabernard et al. 2018) investigated the full matching behavior of their method and determined a minimum matching threshold. Example: (Karami et al. 2018). Different matching procedures (e.g. correlation, Euclidean distance) have different accuracies and should be reported.

**Fourier-transform infrared spectroscopy (FTIR)**

**acquisition parameters (i.e. mode of spectra collection, accessories, crystal type, background recording, spectral range, spectral resolution, number of scans)**

These factors affect the raw spectra that are collected by the FTIR. While attenuated total reflection (ATR) only measures on the surface of the sample, transmission is measured throughout the whole thickness of the particle/material. The surface penetration depth can also depend on the ATR crystal type, incidence angle, and wavelength. Reflectance mode is a third mode option, which uses the reflection of light from the surface of the particle to extract the particle's spectrum. Reflectance is commonly used in automated chemical image mapping where the particles are resting on a surface and the light beam does not transmit throughout the particle. Reflectance spectroscopy can only identify the surface polymer of the particle. Transmission mode may cause total absorbance to the spectrum at which no measurable light reaches the detector at distinct wavelengths. ATR may need a correction to obtain similar peaks if compared to transmission FTIR. Example: (Sebastian Primpke et al. 2018). Describe any accessories used (e.g. microcompression cell, gold-plated microscope slide). Example: (Cabernard et al. 2018) used gold coated polycarbonate filters and gold coated mirrors for method comparison. The material of the crystal used should be stated. How often the background atmospheric signal was recorded should be described. (Sebastian Primpke et al. 2018) found that different spectral ranges had an influence on the number of detected polymers. Spectral range resolution and number of scans are common optimization parameters (Löder and Gerdts 2015).

**pre-processing parameters (i.e. fourier-transformation (ft) parameters, smoothing, baseline correction, data transformation)**

These parameters affect the spectral shape and or intensity and subsequent match. Examples: (Cowger, submitted)

**matching parameters (i.e. FTIR spectral library source, match threshold, matching procedure, range of spectra used to match)**

Matches can only be made to available entries in the library. The threshold sets the probability of false positives and negatives. Different matching procedures have different accuracies. The spectral match that is the most likely may not be the match with the highest hit quality index (HQI). Overlapping peaks can create additive effects or masking effects that may lead to false confidence in matching. Sometimes, manual interpretation of a spectrum leads to matches that differ from the highest HQI result. The method for determining matches, if not based on HQI, should be discussed. This may include visual interpretation and disregarding of matches that are unlikely (e.g. a large pellet matching with a pharmaceutical drug). The spectral range used to match affects which peaks are available for spectral comparison. Peaks for pigments and other substances may appear in the same region as polymer peaks (Lenz et al. 2015). Reporting Examples: (Lorenz et al. 2019) did a large reanalysis of the determined matches for a minimum threshold for different polymer types. (S. Primpke et al. 2017) investigated the matching behavior of seven methods and checked the minimum matching threshold. (Sebastian Primpke et al. 2018) screened a spectral region for its ability to separate different polymer types.

**differential scanning calorimetry (DSC)**

**acquisition parameters (i.e. temperature, time, number of cycles)**

The measured signals are affected by the heating rate, temperature, and number of cycles. Reversible thermal transitions will occur within every cycle of a measurement while overlapping effects like the evaporation of solvent or residual monomers occur only in the first run. To determine characteristic DSC information it is mandatory to report data from the first (irreversible transitions) and second cycle (reversible transitions). Examples: (Sebastian Primpke, submitted)

***matching parameters (i.e. parameters assessed, reference library source, comparison technique)***

Parameters assessed, reference library or data source and comparison technique are not standardized. These factors affect what the material is matched to and how the match is characterized. Examples: (Sebastian Primpke, submitted)

## Microplastic Categorization

***shape, size, texture, color, and polymer category definitions***

The definition of sizes, shapes, color, and polymer classes are not standard. For example, some studies use the particle type term “thread” or “line” to refer to both fragmented fishing gear and line, as well as microfibers, while others break them out as separate types with different assumed sources. As such, what counts as a “thread” or “line” or other shape category needs to be clearly defined in a study. Unique circumstances (such as microfibers that also have threads entwined) should be described. Common size classes include (micro, meso, macro, nano) and these need to be defined by measurable units. The method used to determine and classify color should be discussed. The way that polymers are grouped should be discussed (e.g. grouping low density polyethylene (LDPE) and high density polyethylene (HDPE) together into one category). For a study that defines texture patterns, see (Corcoran, Biesinger, and Grifi 2009). For a study that describes the unique circumstance of a microfiber bundle, see (Rochman et al. 2019). For a source that describes different plastic shapes, see (F. Liboiron et al. 2018).

## Microplastic Quantification

***units (e.g. kg, count, mm)***

Mass, count, and volume are not the same units. The mass of a single particle could be equal to the mass of numerous smaller particles. Therefore, report the units (e.g. count, mass, volume) documented and how they were acquired (e.g. extrapolated or measured). Report multiple measurements in as many units as can be measured. Examples: (Simon, van Alst, and Vollertsen 2018; Dehaut, Hermabessiere, and Duflos 2019)

***size dimensions (e.g. feret minimum or maximum)***

Nomenclature for microplastic size is not yet standardized for size and different units reported hamper reproducibility. If a length is described discuss what it represents (e.g. feret minimum, feret maximum, square root of area). Also explain any physical manipulation of the dimensions (e.g. stretched out). Examples: (Cowger, submitted)

***quantification techniques***

There are automated and manual quantification techniques, these use different assumptions and have different errors. Examples: (Cowger, submitted)

## Toxicology Considerations

***dosed plastic age, polymer, size, color, and shapes***

These factors can influence the toxicity of plastics. Virgin (fresh plastic) will likely have unpolymerized monomers or additives (e.g. stabilizers, dyes) within it or sorbed to it. These can leach out and affect a toxicology experiment. Aged plastic will likely already have lost any remaining monomers and so will be less likely to cause this problem, but other factors can make aged plastic more likely to contain sorbed pollutants. Plastic can also be solvent-

rinsed (e.g. using methanol) and dried thoroughly to clean it prior to use in exposures. (Walpitagama et al. 2019) showed migration of unpolymerized photoinitiator, 1-hydroxycyclohexyl phenyl ketone (1-HCHPK) from a 3D printed plastic to the surrounding water occurred within 24 hours. See also (Liu et al. 2019) for differences in sorption of pollutants between virgin and aged plastics. The toxicity of the particles themselves might be linked to the polymer type. A non-target screening for the presence of additive chemicals associated with the plastic is also useful to describe. Ideally, toxicity studies should describe both particles and a chemical leachate derived from the particles in order to identify the source of any observed toxicological response. If using commercially available test materials for toxicity studies, the presence of surfactants must also be documented and accounted for. Related to the polymer, nearly all absorption takes place in amorphous (non-crystalline) regions of the polymer; therefore crystallinity will significantly affect sorption, especially for large (bulky) organic pollutants (Hüffer and Hofmann 2016; Hartmann et al. 2017). For example, larger polypropylene (PP) microplastics of similar surface area to smaller HDPE microplastics had greater sorption because PP has lower crystallinity (Sanchez 2019). Crystallinity may be either measured (e.g. with DSC) or cited from literature (well documented for most polymers). Particle size and shape can affect the uptake and toxicity of microplastics. Factors such as the size range of prey items for particular study species should be considered when selecting microplastics for use in experiments to increase environmental relevance. Particle size-dependent toxicity has been observed in rotifers (Jeong et al. 2016) and grass shrimp (Gray and Weinstein 2017). Nano-polystyrene particles had 3 orders of magnitude higher surface area than micro-sized polyethylene; this caused polystyrene to sorb significantly more polychlorinated biphenyls (PCBs) even though it is a glassy polymer (Velzeboer, Kwadijk, and Koelmans 2014). Polypropylene was observed to have >3x more surface area than the same particle size of high-density polyethylene, and sorbed significantly more triclocarban (Sanchez 2019). Additionally, free space or volume within the polymer matrix varies with chemical structure (larger space = easier for organic pollutants to absorb) (Pascall et al. 2005; Hartmann et al. 2017; Rochman et al. 2013). Finally, some organisms prefer plastics that look similar in color to their food (Schuyler et al. 2014).

#### ***animal husbandry***

The length of acclimation and starvation, as well as controlling many environmental factors, can affect organism responses to microplastic exposure. If animals were sampled from the wild, how long were they depurated prior to exposures beginning. In what conditions and how long were animals acclimated for, temperature, tank size, number of animals per tank, were they starved prior to exposures (for how long), feeding mode (e.g. filter feeder, deposit feeder), age (days post fertilization or days post hatch if early life stage is used), average size (length, weight), male/female if applicable, water changes, feces removal, open or closed water circulating system, artificial or natural water, Licensing and ethical aspects (e.g. if vertebrates, refer to Institutional Animal Care and Use Committee (IACUC) protocol). Are holding and exposure tanks/rooms and diets free of background microplastic or associated pollutant contamination? If not, report potential sources. Examples: (Devriese et al. 2017; Athey et al. 2020).

#### ***exposure concentration, media, and time***

Dose determines toxicity. The dose metric used to describe the exposure concentration should be presented (e.g. number of particles per L of water or per gram of sediment). Describe what media (e.g. solvents, sediment, organic matter, water, or air). In feeding experiments, concentrations in exposure media should be checked (via cell counter, etc.) before organisms are added and after they are removed. Additionally, certain life stages may be exposed differently if they are in the water column vs sediments. These factors also must be tracked closely to ensure that dosing of organisms is accurate. Reporting

Examples: sediment - (Wright et al. 2013), water (Athey et al. 2020), food - (Watts et al. 2015). The amount of time the animal was exposed to the sample. Was the exposure constant or pulsed? This is typically measured in days but can be in other units as well. Units should be indicated. Different toxic substances will have different equilibrium times with different polymers; this is necessary to accurately determine differences in sorption. Biologically, smaller organisms generally have much shorter elimination times (e.g., time from consuming to defecation) than larger organisms. Depending on the objective, shorter or longer exposure times will be necessary to observe effects due to the substance being studied, therefore, toxicology experiments make decisions on exposure time based on animal physiology and life history. Examples: For equilibrium time of organic pollutants: (C. Wu et al. 2016; P. Wu et al. 2019; Rochman et al. 2013). For biological considerations: (Key et al. 1998) (organic pollutants); (Rochman et al. 2014) (microplastics).

**effects evaluation metrics\***

Which parameters (markers) were evaluated?

**biota metrics\***

Which tissues were analyzed (e.g. stomach only or whole digestive tract)? Tissue weight (wet and dry) for tissues assessed and for the whole organism can aid in interpreting exposure. Typical reporting metrics for species (e.g. shell width and height for bivalves) should be reported to increase comparability with other studies.

## Disclaimer:

Certain commercial equipment, instruments, or materials are identified in this paper to specify adequately the experimental procedure. Such identification does not imply recommendation or endorsement by the National Institute of Standards and Technology, nor does it imply that the materials or equipment identified are necessarily the best available for the purpose.

## References:

- Athey, Samantha N., Samantha D. Albotra, Cessely A. Gordon, Bonnie Monteleone, Pamela Seaton, Anthony L. Andrady, Alison R. Taylor, and Susanne M. Brander. 2020. "Trophic Transfer of Microplastics in an Estuarine Food Chain and the Effects of a Sorbed Legacy Pollutant." *Limnology and Oceanography* 5 (1): 154–62.
- Bagaev, A., A. Mizyuk, L. Khatmullina, I. Isachenko, and I. Chubarenko. 2017. "Anthropogenic Fibres in the Baltic Sea Water Column: Field Data, Laboratory and Numerical Testing of Their Motion." *The Science of the Total Environment* 599-600 (December): 560–71.
- Brander, Susane. submitted "A Guide for Scientists Investigating the Occurrence of Microplastics across Different Matrices." *Applied Spectroscopy*.
- Browne, Mark A., Tamara S. Galloway, and Richard C. Thompson. 2010. "Spatial Patterns of Plastic Debris along Estuarine Shorelines." *Environmental Science & Technology* 44 (9): 3404–9.
- Cabernard, Livia, Lisa Roscher, Claudia Lorenz, Gunnar Gerdts, and Sebastian Pimpke. 2018. "Comparison of Raman and Fourier Transform Infrared Spectroscopy for the Quantification of Microplastics in the Aquatic Environment." *Environmental Science & Technology*, November. <https://doi.org/10.1021/acs.est.8b03438>.
- Cable, Rachel N., Dmitry Beletsky, Raisa Beletsky, Krista Wigginton, Brendan W. Locke, and Melissa B. Duhaime. 2017. "Distribution and Modeled Transport of Plastic Pollution in the Great Lakes, the World's Largest Freshwater Resource." *Frontiers of Environmental Science & Engineering in China* 5: 45.



- Cheung, Pui Kwan, Lewis Ting On Cheung, and Lincoln Fok. 2016. "Seasonal Variation in the Abundance of Marine Plastic Debris in the Estuary of a Subtropical Macro-Scale Drainage Basin in South China." *The Science of the Total Environment* 562 (August): 658–65.
- Claessens, Michiel, Lisbeth Van Cauwenberghe, Michiel B. Vandegehuchte, and Colin R. Janssen. 2013. "New Techniques for the Detection of Microplastics in Sediments and Field Collected Organisms." *Marine Pollution Bulletin* 70 (1-2): 227–33.
- Collard, France, Bernard Gilbert, Gauthier Eppe, Eric Parmentier, and Krishna Das. 2015. "Detection of Anthropogenic Particles in Fish Stomachs: An Isolation Method Adapted to Identification by Raman Spectroscopy." *Archives of Environmental Contamination and Toxicology* 69 (3): 331–39.
- Coppock, Rachel L., Matthew Cole, Penelope K. Lindeque, Ana M. Queirós, and Tamara S. Galloway. 2017. "A Small-Scale, Portable Method for Extracting Microplastics from Marine Sediments." *Environmental Pollution* 230 (November): 829–37.
- Corcoran, Patricia L., Mark C. Biesinger, and Meriem Grifi. 2009. "Plastics and Beaches: A Degrading Relationship." *Marine Pollution Bulletin* 58 (1): 80–84.
- Courtene-Jones, Winnie, Brian Quinn, Fionn Murphy, Stefan F. Gary, and Bhavani E. Narayanaswamy. 2017. "Optimisation of Enzymatic Digestion and Validation of Specimen Preservation Methods for the Analysis of Ingested Microplastics." *Analytical Methods* 9 (9): 1437–45.
- Covernton, Garth A., Christopher M. Pearce, Helen J. Gurney-Smith, Stephen G. Chastain, Peter S. Ross, John F. Dower, and Sarah E. Dudas. 2019. "Size and Shape Matter: A Preliminary Analysis of Microplastic Sampling Technique in Seawater Studies with Implications for Ecological Risk Assessment." *The Science of the Total Environment* 667 (June): 124–32.
- Cowger, Win. submitted "Review of Data Processing and Interpretation Techniques for Microplastics with Future Outlook." *Applied Spectroscopy*.
- Crichton, Ellika M., Marie Noël, Esther A. Gies, and Peter S. Ross. 2017. "A Novel, Density-Independent and FTIR-Compatible Approach for the Rapid Extraction of Microplastics from Aquatic Sediments." *Analytical Methods* 9 (9): 1419–28.
- Dehaut, Alexandre, Anne-Laure Cassone, Laura Frère, Ludovic Hermabessiere, Charlotte Himber, Emmanuel Rinnert, Gilles Rivière, et al. 2016. "Microplastics in Seafood: Benchmark Protocol for Their Extraction and Characterization." *Environmental Pollution* 215 (August): 223–33.
- Dehaut, Alexandre, Ludovic Hermabessiere, and Guillaume Duflos. 2019. "Current Frontiers and Recommendations for the Study of Microplastics in Seafood." *Trends in Analytical Chemistry: TRAC* 116 (July): 346–59.
- Dekiff, Jens H., Dominique Remy, Jörg Klasmeier, and Elke Fries. 2014. "Occurrence and Spatial Distribution of Microplastics in Sediments from Norderney." *Environmental Pollution* 186 (March): 248–56.
- Den Dool, H. van, and P. Dec. Kratz. 1963. "A Generalization of the Retention Index System Including Linear Temperature Programmed Gas—liquid Partition Chromatography." *Journal of Chromatography. A* 11 (January): 463–71.
- Devriese, Lisa I., Bavo De Witte, A. Dick Vethaak, Kris Hostens, and Heather A. Leslie. 2017. "Bioaccumulation of PCBs from Microplastics in Norway Lobster (*Nephrops norvegicus*): An Experimental Study." *Chemosphere* 186 (November): 10–16.
- Devriese, Lisa I., Myra D. van der Meulen, Thomas Maes, Karen Bekaert, Ika Paul-Pont, Laura Frère, Johan Robbens, and A. Dick Vethaak. 2015. "Microplastic Contamination in Brown Shrimp (*Crangon crangon*, Linnaeus 1758) from Coastal Waters of the Southern North Sea and Channel Area." *Marine Pollution Bulletin* 98 (1-2): 179–87.
- De Witte, B., L. Devriese, K. Bekaert, S. Hoffman, G. Vandermeersch, K. Cooreman, and J. Robbens. 2014. "Quality Assessment of the Blue Mussel (*Mytilus Edulis*): Comparison

- between Commercial and Wild Types." *Marine Pollution Bulletin* 85 (1): 146–55.
- Enders, Kristina, Robin Lenz, Sabrina Beer, and Colin A. Stedmon. 2017. "Extraction of Microplastic from Biota: Recommended Acidic Digestion Destroys Common Plastic Polymers." *ICES Journal of Marine Science: Journal Du Conseil* 74 (1): 326–31.
- Enders, Kristina, Robin Lenz, Colin A. Stedmon, and Torkel G. Nielsen. 2015. "Abundance, Size and Polymer Composition of Marine Microplastics  $\geq 10\mu\text{m}$  in the Atlantic Ocean and Their Modelled Vertical Distribution." *Marine Pollution Bulletin* 100 (1): 70–81.
- Erni-Cassola, Gabriel, Matthew I. Gibson, Richard C. Thompson, and Joseph A. Christie-Oleza. 2017. "Lost, but Found with Nile Red: A Novel Method for Detecting and Quantifying Small Microplastics (1 Mm to 20  $\mu\text{m}$ ) in Environmental Samples." *Environmental Science & Technology* 51 (23): 13641–48.
- Fischer, Marten, and Barbara M. Scholz-Böttcher. 2017. "Simultaneous Trace Identification and Quantification of Common Types of Microplastics in Environmental Samples by Pyrolysis-Gas Chromatography–Mass Spectrometry." *Environmental Science & Technology* 51 (9): 5052–60.
- Frère, L., I. Paul-Pont, E. Rinnert, S. Petton, J. Jaffré, I. Bihannic, P. Soudant, C. Lambert, and A. Huvet. 2017. "Influence of Environmental and Anthropogenic Factors on the Composition, Concentration and Spatial Distribution of Microplastics: A Case Study of the Bay of Brest (Brittany, France)." *Environmental Pollution* 225 (June): 211–22.
- Frias, J. P. G. L., P. Sobral, and A. M. Ferreira. 2010. "Organic Pollutants in Microplastics from Two Beaches of the Portuguese Coast." *Marine Pollution Bulletin* 60 (11): 1988–92.
- Fries, Elke, Jens H. Dekiff, Jana Willmeyer, Marie-Theres Nuelle, Martin Ebert, and Dominique Remy. 2013. "Identification of Polymer Types and Additives in Marine Microplastic Particles Using Pyrolysis-GC/MS and Scanning Electron Microscopy." *Environmental Science. Processes & Impacts* 15 (10): 1949–56.
- Friesen, Lisa W. von, Maria E. Granberg, Martin Hassellöv, Geir W. Gabrielsen, and Kerstin Magnusson. 2019. "An Efficient and Gentle Enzymatic Digestion Protocol for the Extraction of Microplastics from Bivalve Tissue." *Marine Pollution Bulletin* 142 (May): 129–34.
- Ghosal, Sutapa, Michael Chen, Jeff Wagner, Zhong-Min Wang, and Stephen Wall. 2017. "Molecular Identification of Polymers and Anthropogenic Particles Extracted from Oceanic Water and Fish Stomach--A Raman Micro-Spectroscopy Study." *Environmental Pollution* . <https://www.sciencedirect.com/science/article/pii/S0269749117309235>.
- Gray, Austin D., and John E. Weinstein. 2017. "Size-and Shape-Dependent Effects of Microplastic Particles on Adult Daggerblade Grass Shrimp (*Palaemonetes Pugio*)." *Environmental Toxicology and Chemistry / SETAC* 36 (11): 3074–80.
- Haave, Marte, Claudia Lorenz, Sebastian Pripcke, and Gunnar Gerdt. 2019. "Different Stories Told by Small and Large Microplastics in Sediment - First Report of Microplastic Concentrations in an Urban Recipient in Norway." *Marine Pollution Bulletin* 141 (April): 501–13.
- Hardesty, Britta D., Joseph Harari, Atsuhiko Isobe, Laurent Lebreton, Nikolai Maximenko, Jim Potemra, Erik van Sebille, A. Dick Vethaak, and Chris Wilcox. 2017. "Using Numerical Model Simulations to Improve the Understanding of Micro-Plastic Distribution and Pathways in the Marine Environment." *Frontiers in Marine Science* 4: 30.
- Hartmann, Nanna B., Sinja Rist, Julia Bodin, Louise Hs Jensen, Stine N. Schmidt, Philipp Mayer, Anders Meibom, and Anders Baun. 2017. "Microplastics as Vectors for Environmental Contaminants: Exploring Sorption, Desorption, and Transfer to Biota." *Integrated Environmental Assessment and Management* 13 (3): 488–93.
- Helsel, Dennis R. 2006. "Fabricating Data: How Substituting Values for Nondetects Can Ruin Results, and What Can Be Done about It." *Chemosphere* 65 (11): 2434–39.
- Hendrickson, Erik, Elizabeth C. Minor, and Kathryn Schreiner. 2018. "Microplastic Abundance and Composition in Western Lake Superior As Determined via Microscopy, Pyr-GC/MS,

- and FTIR." *Environmental Science & Technology* 52 (4): 1787–96.
- Hermabessiere, Ludovic, Charlotte Himber, Béatrice Boricaud, Maria Kazour, Rachid Amara, Anne-Laure Cassone, Michel Laurentie, et al. 2018. "Optimization, Performance, and Application of a Pyrolysis-GC/MS Method for the Identification of Microplastics." *Analytical and Bioanalytical Chemistry* 410 (25): 6663–76.
- Hermesen, Enya, Svenja M. Mintenig, Ellen Besseling, and Albert A. Koelmans. 2018. "Quality Criteria for the Analysis of Microplastic in Biota Samples: A Critical Review." *Environmental Science & Technology* 52 (18): 10230–40.
- Hidalgo-Ruz, Valeria, Lars Gutow, Richard C. Thompson, and Martin Thiel. 2012. "Microplastics in the Marine Environment: A Review of the Methods Used for Identification and Quantification." *Environmental Science & Technology* 46 (6): 3060–75.
- Hüffer, Thorsten, and Thilo Hofmann. 2016. "Sorption of Non-Polar Organic Compounds by Micro-Sized Plastic Particles in Aqueous Solution." *Environmental Pollution* 214 (July): 194–201.
- Hurley, Rachel, Jamie Woodward, and James J. Rothwell. 2018. "Microplastic Contamination of River Beds Significantly Reduced by Catchment-Wide Flooding." *Nature Geoscience* 11 (4): 251–57.
- Imhof, Hannes K., Johannes Schmid, Reinhard Niessner, Natalia P. Ivleva, and Christian Laforsch. 2012. "A Novel, Highly Efficient Method for the Separation and Quantification of Plastic Particles in Sediments of Aquatic Environments: Novel Plastic Particle Separation Method." *Limnology and Oceanography, Methods / ASLO* 10 (7): 524–37.
- "Interim Report of the Working Group on Marine Litter (WGML)." 2018.  
<http://ices.dk/sites/pub/Publication%20Reports/Expert%20Group%20Report/HAPISG/2018/01%20WGML%20-%20Report%20of%20the%20Working%20Group%20on%20Marine%20Litter.pdf>.
- Ivleva, Natalia P., Alexandra C. Wiesheu, and Reinhard Niessner. 2017. "Microplastic in Aquatic Ecosystems." *Angewandte Chemie* 56 (7): 1720–39.
- Iwasaki, Shinsuke, Atsuhiko Isobe, Shin'ichiro Kako, Keiichi Uchida, and Tadashi Tokai. 2017. "Fate of Microplastics and Mesoplastics Carried by Surface Currents and Wind Waves: A Numerical Model Approach in the Sea of Japan." *Marine Pollution Bulletin* 121 (1-2): 85–96.
- Jeong, Chang-Bum, Eun-Ji Won, Hye-Min Kang, Min-Chul Lee, Dae-Sik Hwang, Un-Ki Hwang, Bingsheng Zhou, Sami Souissi, Su-Jae Lee, and Jae-Seong Lee. 2016. "Microplastic Size-Dependent Toxicity, Oxidative Stress Induction, and P-JNK and P-p38 Activation in the Monogonont Rotifer (*Brachionus Koreanus*)." *Environmental Science & Technology* 50 (16): 8849–57.
- Käppler, Andrea, Dieter Fischer, Sonja Oberbeckmann, Gerald Schernewski, Matthias Labrenz, Klaus-Jochen Eichhorn, and Brigitte Voit. 2016. "Analysis of Environmental Microplastics by Vibrational Microspectroscopy: FTIR, Raman or Both?" *Analytical and Bioanalytical Chemistry* 408 (29): 8377–91.
- Karakolis, Evan G., Brian Nguyen, Jae Bem You, Chelsea M. Rochman, and David Sinton. 2019. "Fluorescent Dyes for Visualizing Microplastic Particles and Fibers in Laboratory-Based Studies." *Environmental Science & Technology Letters*.  
<https://pubs.acs.org/doi/abs/10.1021/acs.estlett.9b00241>.
- Karami, Ali, Abolfazl Golieskardi, Cheng Keong Choo, Vincent Larat, Samaneh Karbalaei, and Babak Salamatinia. 2018. "Microplastic and Mesoplastic Contamination in Canned Sardines and Sprats." *The Science of the Total Environment* 612 (January): 1380–86.
- Karami, Ali, Nicholas Romano, Tamara Galloway, and Hazilawati Hamzah. 2016. "Virgin Microplastics Cause Toxicity and Modulate the Impacts of Phenanthrene on Biomarker Responses in African Catfish (*Clarias Gariepinus*)." *Environmental Research* 151 (November): 58–70.
- Kedzierski, Mikaël, Jonathan Villain, Mathilde Falcou-Préfol, Marie Emmanuelle Kerros,

- Maryvonne Henry, Maria Luiza Pedrotti, and Stéphane Bruzaud. 2019. "Microplastics in Mediterranean Sea: A Protocol to Robustly Assess Contamination Characteristics." *PLoS One* 14 (2): e0212088.
- Key, Peter B., Michael H. Fulton, Geoffrey I. Scott, Shawn L. Layman, and Edward F. Wirth. 1998. "Lethal and Sublethal Effects of Malathion on Three Life Stages of the Grass Shrimp, *Palaemonetes Pugio*." *Aquatic Toxicology* 40 (4): 311–22.
- Kukulka, Tobias, Kara L. Law, and Giora Proskurowski. 2016. "Evidence for the Influence of Surface Heat Fluxes on Turbulent Mixing of Microplastic Marine Debris." *Journal of Physical Oceanography* 46 (3): 809–15.
- Lattin, G. L., C. J. Moore, A. F. Zellers, S. L. Moore, and S. B. Weisberg. 2004. "A Comparison of Neustonic Plastic and Zooplankton at Different Depths near the Southern California Shore." *Marine Pollution Bulletin* 49 (4): 291–94.
- Lenz, Robin, Kristina Enders, Colin A. Stedmon, David M. A. Mackenzie, and Torkel Gissel Nielsen. 2015. "A Critical Assessment of Visual Identification of Marine Microplastic Using Raman Spectroscopy for Analysis Improvement." *Marine Pollution Bulletin* 100 (1): 82–91.
- Leslie, H. A., S. H. Brandsma, M. J. M. van Velzen, and A. D. Vethaak. 2017. "Microplastics En Route: Field Measurements in the Dutch River Delta and Amsterdam Canals, Wastewater Treatment Plants, North Sea Sediments and Biota." *Environment International* 101 (April): 133–42.
- Liboiron, France, Justine Ammendolia, Jacquelyn Saturno, Jessica Melvin, Alex Zahara, Natalie Richárd, and Max Liboiron. 2018. "A Zero Percent Plastic Ingestion Rate by Silver Hake (*Merluccius Bilinearis*) from the South Coast of Newfoundland, Canada." *Marine Pollution Bulletin* 131 (June): 267–75.
- Liboiron, Max, France Liboiron, Emily Wells, Natalie Richárd, Alexander Zahara, Charles Mather, Hillary Bradshaw, and Judyannet Murichi. 2016. "Low Plastic Ingestion Rate in Atlantic Cod (*Gadus Morhua*) from Newfoundland Destined for Human Consumption Collected through Citizen Science Methods." *Marine Pollution Bulletin* 113 (1-2): 428–37.
- Liu, Fei-Fei, Guang-Zhou Liu, Zhi-Lin Zhu, Su-Chun Wang, and Fei-Fei Zhao. 2019. "Interactions between Microplastics and Phthalate Esters as Affected by Microplastics Characteristics and Solution Chemistry." *Chemosphere* 214 (January): 688–94.
- Löder, Martin G. J., and Gunnar Gerdts. 2015. "Methodology Used for the Detection and Identification of Microplastics—A Critical Appraisal." In *Marine Anthropogenic Litter*, edited by Melanie Bergmann, Lars Gutow, and Michael Klages, 201–27. Cham: Springer International Publishing.
- Lorenz, Claudia, Lisa Roscher, Melanie S. Meyer, Lars Hildebrandt, Julia Prume, Martin G. J. Löder, Sebastian Pimpke, and Gunnar Gerdts. 2019. "Spatial Distribution of Microplastics in Sediments and Surface Waters of the Southern North Sea." *Environmental Pollution* 252 (September): 1719–29.
- Lusher, A. L., N. A. Welden, P. Sobral, and M. Cole. 2017. "Sampling, Isolating and Identifying Microplastics Ingested by Fish and Invertebrates." *Analytical Methods* 9 (9): 1346–60.
- Lusher, Amy. submitted "Isolation and Extraction of Microplastics from Environmental Samples: An Evaluation of Practical Approaches and Recommendations for Further Harmonisation." *Applied Spectroscopy*.
- Lusher, Amy L., Ann Burke, Ian O'Connor, and Rick Officer. 2014. "Microplastic Pollution in the Northeast Atlantic Ocean: Validated and Opportunistic Sampling." *Marine Pollution Bulletin* 88 (1-2): 325–33.
- Lu, Shulai, Rongjun Qu, and Jacqueline Forcada. 2009. "Preparation of Magnetic Polymeric Composite Nanoparticles by Seeded Emulsion Polymerization." *Materials Letters* 63 (9): 770–72.
- Maes, Thomas, Rebecca Jessop, Nikolaus Wellner, Karsten Haupt, and Andrew G. Mayes. 2017. "A Rapid-Screening Approach to Detect and Quantify Microplastics Based on

- Fluorescent Tagging with Nile Red.” *Scientific Reports* 7 (March): 44501.
- Maes, Thomas, Myra D. Van der Meulen, Lisa I. Devriese, Heather A. Leslie, Arnaud Huvet, Laura Frère, Johan Robbens, and A. Dick Vethaak. 2017. “Microplastics Baseline Surveys at the Water Surface and in Sediments of the North-East Atlantic.” *Frontiers in Marine Science* 4: 135.
- Mani, Thomas, Sebastian Pimpke, Claudia Lorenz, Gunnar Gerdts, and Patricia Burkhardt-Holm. 2019. “Microplastic Pollution in Benthic Midstream Sediments of the Rhine River.” *Environmental Science & Technology* 53 (10): 6053–62.
- Martin, Katherine M., Elizabeth A. Hasenmueller, John R. White, Lisa G. Chambers, and Jeremy L. Conkle. 2018. “Sampling, Sorting, and Characterizing Microplastics in Aquatic Environments with High Suspended Sediment Loads and Large Floating Debris.” *Journal of Visualized Experiments: JoVE*, no. 137 (July). <https://doi.org/10.3791/57969>.
- Masura, Julie, Joel E. Baker, Gregory Duane Foster, Courtney Arthur, and Carlie Herring. 2015. “Laboratory Methods for the Analysis of Microplastics in the Marine Environment: Recommendations for Quantifying Synthetic Particles in Waters and Sediments.” <https://repository.library.noaa.gov/view/noaa/10296>.
- McNeish, R. E., L. H. Kim, H. A. Barrett, S. A. Mason, J. J. Kelly, and T. J. Hoellein. 2018. “Microplastic in Riverine Fish Is Connected to Species Traits.” *Scientific Reports* 8 (1): 11639.
- Miller, Rachael Z., Andrew J. R. Watts, Brooke O. Winslow, Tamara S. Galloway, and Abigail P. W. Barrows. 2017. “Mountains to the Sea: River Study of Plastic and Non-Plastic Microfiber Pollution in the Northeast USA.” *Marine Pollution Bulletin*, July. <https://doi.org/10.1016/j.marpolbul.2017.07.028>.
- Munno, Keenan, Hannah De Frond, Bridget O’Donnell, and Chelsea M. Rochman. 2020. “Increasing the Accessibility for Characterizing Microplastics: Introducing New Application-Based and Spectral Libraries of Plastic Particles (SLoPP and SLoPP-E).” *Analytical Chemistry*, January. <https://doi.org/10.1021/acs.analchem.9b03626>.
- Munno, Keenan, Paul A. Helm, Donald A. Jackson, Chelsea Rochman, and Alina Sims. 2018. “Impacts of Temperature and Selected Chemical Digestion Methods on Microplastic Particles.” *Environmental Toxicology and Chemistry / SETAC* 37 (1): 91–98.
- Murray, Fiona, and Phillip Rhys Cowie. 2011. “Plastic Contamination in the Decapod Crustacean *Nephrops norvegicus* (Linnaeus, 1758).” *Marine Pollution Bulletin* 62 (6): 1207–17.
- Nel, Holly A., Tatenda Dalu, Ryan J. Wasserman, and Jeffrey W. Hean. 2019. “Colour and Size Influences Plastic Microbead Underestimation, regardless of Sediment Grain Size.” *The Science of the Total Environment* 655 (March): 567–70.
- Oßmann, Barbara E., George Sarau, Heinrich Holtmannspötter, Monika Pischetsrieder, Silke H. Christiansen, and Wilhelm Dicke. 2018. “Small-Sized Microplastics and Pigmented Particles in Bottled Mineral Water.” *Water Research* 141 (May): 307–16.
- Oßmann, Barbara E., George Sarau, Sebastian W. Schmitt, Heinrich Holtmannspötter, Silke H. Christiansen, and Wilhelm Dicke. 2017. “Development of an Optimal Filter Substrate for the Identification of Small Microplastic Particles in Food by Micro-Raman Spectroscopy.” *Analytical and Bioanalytical Chemistry* 409 (16): 4099–4109.
- Pascall, Melvin A., Mary E. Zabik, Matthew J. Zabik, and Ruben J. Hernandez. 2005. “Uptake of Polychlorinated Biphenyls (PCBs) from an Aqueous Medium by Polyethylene, Polyvinyl Chloride, and Polystyrene Films.” *Journal of Agricultural and Food Chemistry* 53 (1): 164–69.
- Pimpke, S., P. A. Dias, and G. Gerdts. 2019. “Automated Identification and Quantification of Microfibres and Microplastics.” *Analytical Methods* 11 (16): 2138–47.
- Pimpke, Sebastian. submitted “Critical Assessment of Analytical Methods for the Harmonized and Cost Efficient Analysis of Microplastics.” *Applied Spectroscopy*.

- Primpke, Sebastian, Marisa Wirth, Claudia Lorenz, and Gunnar Gerdts. 2018. "Reference Database Design for the Automated Analysis of Microplastic Samples Based on Fourier Transform Infrared (FTIR) Spectroscopy." *Analytical and Bioanalytical Chemistry*, July. <https://doi.org/10.1007/s00216-018-1156-x>.
- Primpke, S., C. Lorenz, R. Rascher-Friesenhausen, and G. Gerdts. 2017. "An Automated Approach for Microplastics Analysis Using Focal Plane Array (FPA) FTIR Microscopy and Image Analysis." *Analytical Methods* 9 (9): 1499–1511.
- Reisser, J., B. Slat, K. Noble, K. du Plessis, M. Epp, M. Proietti, J. de Sonnevile, T. Becker, and C. Pattiaratchi. 2015. "The Vertical Distribution of Buoyant Plastics at Sea: An Observational Study in the North Atlantic Gyre." *Biogeosciences; Katlenburg-Lindau* 12 (4): 1249.
- Rochman, Chelsea M., Cole Brookson, Jacqueline Bikker, Natasha Djuric, Arielle Earn, Kennedy Bucci, Samantha Athey, et al. 2019. "Rethinking Microplastics as a Diverse Contaminant Suite." *Environmental Toxicology and Chemistry / SETAC* 38 (4): 703–11.
- Rochman, Chelsea M., Eunha Hoh, Brian T. Hentschel, and Shawn Kaye. 2013. "Long-Term Field Measurement of Sorption of Organic Contaminants to Five Types of Plastic Pellets: Implications for Plastic Marine Debris." *Environmental Science & Technology* 47 (3): 1646–54.
- Rochman, Chelsea M., Tomofumi Kurobe, Ida Flores, and Swee J. Teh. 2014. "Early Warning Signs of Endocrine Disruption in Adult Fish from the Ingestion of Polyethylene with and without Sorbed Chemical Pollutants from the Marine Environment." *The Science of the Total Environment* 493 (September): 656–61.
- Rowshyra A. Castañeda, Suncica Avlijas, M. Anouk Simard, Anthony Ricciardia. 2014. "Microplastic Pollution Discovered in St. Lawrence River Sediments." *Marine Pollution Bulletin* 88 (1-2): 5–6.
- Sanchez. Alterra. 2019. *In prep.*
- Schuyler, Qamar A., Chris Wilcox, Kathy Townsend, B. Denise Hardesty, and N. Justin Marshall. 2014. "Mistaken Identity? Visual Similarities of Marine Debris to Natural Prey Items of Sea Turtles." *BMC Ecology* 14 (May): 14.
- Simon, Márta, Nikki van Alst, and Jes Vollertsen. 2018. "Quantification of Microplastic Mass and Removal Rates at Wastewater Treatment Plants Applying Focal Plane Array (FPA)-Based Fourier Transform Infrared (FT-IR) Imaging." *Water Research* 142 (October): 1–9.
- Smith, Stephen D. A., and Ana Markic. 2013. "Estimates of Marine Debris Accumulation on Beaches Are Strongly Affected by the Temporal Scale of Sampling." *PloS One* 8 (12): e83694.
- Song, Young Kyoung, Sang Hee Hong, Mi Jang, Gi Myung Han, Manviri Rani, Jongmyoung Lee, and Won Joon Shim. 2015. "A Comparison of Microscopic and Spectroscopic Identification Methods for Analysis of Microplastics in Environmental Samples." *Marine Pollution Bulletin* 93 (1-2): 202–9.
- Spear, Larry B., David G. Ainley, and Christine A. Ribic. 1995. "Incidence of Plastic in Seabirds from the Tropical Pacific, 1984–1991: Relation with Distribution of Species, Sex, Age, Season, Year and Body Weight." *Marine Environmental Research* 40 (2): 123–46.
- Tanaka, Kosuke, and Hideshige Takada. 2016. "Microplastic Fragments and Microbeads in Digestive Tracts of Planktivorous Fish from Urban Coastal Waters." *Scientific Reports* 6 (September): 34351.
- Thiele, Christina J., Malcolm D. Hudson, and Andrea E. Russell. 2019. "Evaluation of Existing Methods to Extract Microplastics from Bivalve Tissue: Adapted KOH Digestion Protocol Improves Filtration at Single-Digit Pore Size." *Marine Pollution Bulletin* 142 (May): 384–93.
- Thompson, Richard C., Ylva Olsen, Richard P. Mitchell, Anthony Davis, Steven J. Rowland, Anthony W. G. John, Daniel McGonigle, and Andrea E. Russell. 2004. "Lost at Sea: Where Is All the Plastic?" *Science* 304 (5672): 838.

- Torre, Michele, Nikoletta Digka, Aikaterini Anastasopoulou, Catherine Tsangaris, and Chryssi Mytilineou. 2016. "Anthropogenic Microfibres Pollution in Marine Biota. A New and Simple Methodology to Minimize Airborne Contamination." *Marine Pollution Bulletin* 113 (1-2): 55–61.
- Van Cauwenberghe, Lisbeth, and Colin R. Janssen. 2014. "Microplastics in Bivalves Cultured for Human Consumption." *Environmental Pollution* 193 (October): 65–70.
- Vandermeersch, Griet, Lisbeth Van Cauwenberghe, Colin R. Janssen, Antonio Marques, Kit Granby, Gabriella Fait, Michiel J. J. Kotterman, et al. 2015. "A Critical View on Microplastic Quantification in Aquatic Organisms." *Environmental Research* 143 (Pt B): 46–55.
- Velzeboer, I., C. J. A. F. Kwadijk, and A. A. Koelmans. 2014. "Strong Sorption of PCBs to Nanoplastics, Microplastics, Carbon Nanotubes, and Fullerenes." *Environmental Science & Technology* 48 (9): 4869–76.
- Vicentini, Denice Schulz, Diego José Nogueira, Silvia Pedroso Melegari, Miriam Arl, Jéssica Schweitzer Köerich, Luiza Cruz, Naiara Mottim Justino, et al. 2019. "Toxicological Evaluation and Quantification of Ingested Metal-Core Nanoplastic by *Daphnia Magna* Through Fluorescence and Inductively Coupled Plasma-Mass Spectrometric Methods." *Environmental Toxicology and Chemistry / SETAC* 38 (10): 2101–10.
- Wagner, Jeff, Zhong-Min Wang, Sutapa Ghosal, Chelsea Rochman, Margy Gassel, and Stephen Wall. 2017. "Novel Method for the Extraction and Identification of Microplastics in Ocean Trawl and Fish Gut Matrices." *Analytical Methods* 9 (9): 1479–90.
- Walpitagama, Milanga, Megan Carve, Alon M. Douek, Charlene Trestrail, Yutao Bai, Jan Kaslin, and Donald Wlodkowic. 2019. "Additives Migrating from 3D-Printed Plastic Induce Developmental Toxicity and Neuro-Behavioural Alterations in Early Life Zebrafish (*Danio Rerio*)." *Aquatic Toxicology* 213 (August): 105227.
- Wang, Lei, Junjie Zhang, Shaogang Hou, and Hongwen Sun. 2017. "A Simple Method for Quantifying Polycarbonate and Polyethylene Terephthalate Microplastics in Environmental Samples by Liquid Chromatography–Tandem Mass Spectrometry." <https://pubag.nal.usda.gov/catalog/5865929>.
- Watts, Andrew J. R., Mauricio A. Urbina, Shauna Corr, Ceri Lewis, and Tamara S. Galloway. 2015. "Ingestion of Plastic Microfibers by the Crab *Carcinus Maenas* and Its Effect on Food Consumption and Energy Balance." *Environmental Science & Technology* 49 (24): 14597–604.
- Wesch, Charlotte, Anna Maria Elert, Manuel Wörner, Ulrike Braun, Roland Klein, and Martin Paulus. 2017. "Assuring Quality in Microplastic Monitoring: About the Value of Clean-Air Devices as Essentials for Verified Data." *Scientific Reports* 7 (1): 5424.
- Wessel, Caitlin C., Grant R. Lockridge, David Battiste, and Just Cebrian. 2016. "Abundance and Characteristics of Microplastics in Beach Sediments: Insights into Microplastic Accumulation in Northern Gulf of Mexico Estuaries." *Marine Pollution Bulletin* 109 (1): 178–83.
- Wiggin, Kara J., and Erika B. Holland. 2019. "Validation and Application of Cost and Time Effective Methods for the Detection of 3–500 µm Sized Microplastics in the Urban Marine and Estuarine Environments Surrounding Long Beach, California." *Marine Pollution Bulletin* 143 (June): 152–62.
- Willis, Kathryn A., Ruth Eriksen, Chris Wilcox, and Britta D. Hardesty. 2017. "Microplastic Distribution at Different Sediment Depths in an Urban Estuary." *Frontiers in Marine Science* 4: 419.
- Wright, Stephanie L., Darren Rowe, Richard C. Thompson, and Tamara S. Galloway. 2013. "Microplastic Ingestion Decreases Energy Reserves in Marine Worms." *Current Biology: CB* 23 (23): R1031–33.
- Wu, Chenxi, Kai Zhang, Xiaolong Huang, and Jiantong Liu. 2016. "Sorption of Pharmaceuticals and Personal Care Products to Polyethylene Debris." *Environmental Science and Pollution*

*Research International* 23 (9): 8819–26.

Wu, Pengfei, Zongwei Cai, Hangbiao Jin, and Yuanyuan Tang. 2019. "Adsorption Mechanisms of Five Bisphenol Analogues on PVC Microplastics." *The Science of the Total Environment* 650 (Pt 1): 671–78.

Zbyszewski, Maciej, Patricia L. Corcoran, and Alexandra Hockin. 2014. "Comparison of the Distribution and Degradation of Plastic Debris along Shorelines of the Great Lakes, North America." *Journal of Great Lakes Research* 40 (2): 288–99.
