# Supplementary material for: Reporting Guidelines to Increase the Reproducibility and Comparability of Research on Microplastics
Source: PubMed Central journal article supplement — Appl Spectrosc. 2020 Jun 12;74(9):1066–77. doi: 10.1177/0003702820930292 (PMC8216484; doi:10.1177/0003702820930292), 2020-06-12
Supplement: NIHMS1701341-supplement-Cowger_et_al_SI_2_Checklist.pdf [file NIHMS1701341-supplement-Cowger_et_al_SI_2_Checklist.pdf]

# Reporting guidelines for microplastic research: Checklist

## Authors:

Win Cowger\*, Andy M. Booth, Bonnie M. Hamilton, Clara Thaysen, Sebastian Primpke, Keenan Munno, Amy L. Lusher, Alexandre Dehaut, Vitor P. Vaz, Max Liboiron, Lisa I. Devriese, Ludovic Hermabessiere, Chelsea Rochman, Samantha N. Athey, Jennifer M. Lynch, Hannah De Frond, Andrew Gray, Oliver A.H. Jones, Susanne Brander, Clare Steele, Shelly Moore, Alterra Sanchez, Holly Nel.

**Corresponding Author: Win Cowger; [wincowger@gmail.com](mailto:wincowger@gmail.com)**

## How to use:

The Checklist is meant for those already familiar with the methods and reasons for reporting outlined in the other documents. This document outlines the essential elements to report about microplastic research methods to make them reproducible and comparable. This attempts to cover most of the common methods in the field but some methods have not been covered and researchers will need to develop their own guidelines for those. Groups of methods are in bold. To use these guidelines, first assess which groups of methods apply to your study. Next, assess which of the subgroups (tab separated to indicate more detailed levels of grouping) apply to your study. These can be highlighted for easy reference. At the level of the most detailed subgroups that apply to your study, all italicized criteria must be defined, described, or discussed for the method to be reproducible and comparable. All criteria always apply to groups that do not have subgroups. When units are given, they are examples not prescriptive. Whenever “i.e.” is used we think that all the stated components are important to report. Guidelines indicated with an asterisk (\*) were recommended during the review process and added. All other guidelines were voted on by at least a majority (51%) of coauthors of this document. Finally, we recognize that these guidelines should not be the sole criteria for determining what is suitable for publication, but should be a tool used to help reporting methods in publications improve in general.

# Reporting Guidelines Checklist

## Components to Report in All Procedures

materials

*all manufacturers of materials and instruments and their calibration<sup>1</sup>*

*all software used and their calibration<sup>2</sup>*

quality assurance/quality control

error propagation

*how instrumental, methodological, and/or statistical error was propagated<sup>6-5</sup>*

replicates

*number of replicates<sup>6</sup>*

*how replicates were nested within samples<sup>7</sup>*

limit of detection

*quantitative detection threshold<sup>8</sup>*

*plastic morphology, size, color, and polymer limitations of method<sup>8-19</sup>*

*method of accounting for nondetects<sup>20,21</sup>*

blank controls

*number of controls<sup>9,22</sup>*

*characteristics of plastics found in blanks with same rigor as samples<sup>12</sup>*

*potential sources of contamination<sup>23</sup>*

*point of entry and exit to method<sup>23</sup>*

positive controls

*morphology, size, color, and polymer type of positive controls<sup>9,22,24</sup>*

*positive control correction procedure<sup>22,24</sup>*

*point of entry and exit to method<sup>24</sup>*

contamination mitigation

*clothing policies<sup>9,25</sup>*

*purification technique for reagents<sup>17,26</sup>*

|                                                                                                                  |
|------------------------------------------------------------------------------------------------------------------|
| <i>glassware cleaning techniques</i> <sup>27</sup>                                                               |
| <i>containment used (e.g. laminar flow cabinet/hoods, glove bags)</i> <sup>9,17,28–30</sup>                      |
| data reporting                                                                                                   |
| <i>share raw data and analysis code as often as possible</i> <sup>2,31–34</sup>                                  |
| <b>Field Sampling</b>                                                                                            |
| <i>where (e.g. region) and when (e.g. date, time) the sample was collected</i> <sup>20,35–40</sup>               |
| <i>size (e.g. m<sup>3</sup>, kg) and composition (e.g. sediment, water, biota) of the sample</i> <sup>9,41</sup> |
| <i>location at the site that sample was collected (e.g. 3 cm depth of surface sediment)</i> <sup>42</sup>        |
| <i>sample device dimensions and deployment procedures</i> <sup>22,43–46</sup>                                    |
| <i>environmental or infrastructure factors that may affect interpretation of results</i> <sup>46–52</sup>        |
| <i>how samples are stored and transported</i> <sup>9,53,54</sup>                                                 |
| <b>Sample Preparation</b>                                                                                        |
| homogenization                                                                                                   |
| <i>homogenization technique</i> <sup>55</sup>                                                                    |
| splitting/subsetting                                                                                             |
| <i>sample splitting/subsetting technique</i> <sup>46</sup>                                                       |
| drying                                                                                                           |
| <i>sample drying temperature and time</i> <sup>56</sup>                                                          |
| synthesized plastic                                                                                              |
| <i>synthesized plastic polymer, molecular characteristics, size, color, texture, and shape</i> <sup>57,58</sup>  |
| <i>synthesized plastic synthesis technique</i> <sup>57,59</sup>                                                  |
| fluorescent dye                                                                                                  |
| <i>dye type, concentration, and solvent used</i> <sup>60–62</sup>                                                |
| <i>dye application technique</i> <sup>60</sup>                                                                   |
| sieving strategy                                                                                                 |
| <i>sieve mesh size</i> <sup>55</sup>                                                                             |
| <i>if sample was wet or dry sieved</i> <sup>65</sup>                                                             |
| density separation                                                                                               |
| <i>concentration, density, and composition (e.g. CaCl<sub>2</sub>, ZnCl) of solution</i> <sup>53,63,64</sup>     |

|                                                                                                        |
|--------------------------------------------------------------------------------------------------------|
| <i>time of separation</i> <sup>65</sup>                                                                |
| <i>device used</i> <sup>29,65–69</sup>                                                                 |
| digestion                                                                                              |
| <i>duration and temperature of digestion</i> <sup>70–72</sup>                                          |
| <i>digestion solution composition</i> <sup>24,70,72</sup>                                              |
| <i>ratio of digestion fluid to sample</i> <sup>24,70,72,73</sup>                                       |
| filtration                                                                                             |
| <i>filter composition, porosity, diameter</i> <sup>17,74,75</sup>                                      |
| <b>Microplastic Identification</b>                                                                     |
| visual identification                                                                                  |
| imaging settings                                                                                       |
| <i>image settings (e.g. contrast, gain, saturation, light intensity)</i> <sup>31</sup>                 |
| <i>magnification (e.g. scale bar, 50X objective)</i> <sup>76</sup>                                     |
| light microscopy                                                                                       |
| <i>magnification used during identification</i> <sup>61</sup>                                          |
| <i>shapes, colors, textures, and reflectance, used to differentiate plastic</i> <sup>76–78</sup>       |
| fluorescence microscopy                                                                                |
| <i>magnification used during identification</i> <sup>61</sup>                                          |
| <i>fluorescence light wavelength, intensity, and exposure time to light source</i> <sup>61,62,79</sup> |
| <i>threshold intensity used to identify plastic</i> <sup>79</sup>                                      |
| scanning electron microscopy (SEM)                                                                     |
| <i>coating used (e.g. metal type, water vapour)</i> <sup>80</sup>                                      |
| <i>magnification used during identification</i> <sup>80</sup>                                          |
| <i>textures used to differentiate plastic</i> <sup>80</sup>                                            |
| chemical identification                                                                                |
| pyrolysis gas chromatography mass spectrometry (py-GC/MS)                                              |
| <i>pyrolysis reacting gases, temperature, duration</i> <sup>16,81</sup>                                |
| <i>GC oven program, temperature, carrier gas, and column characteristics</i> <sup>16,81</sup>          |
| <i>MS ionization voltage, mass range, scanning frequency, temperature</i> <sup>16,31</sup>             |

|                                                                                                                                                                                           |
|-------------------------------------------------------------------------------------------------------------------------------------------------------------------------------------------|
| <i>py-GC/MS matching criteria (i.e. match threshold, linear retention indices (LRI), and kovats index)<sup>16,82</sup></i>                                                                |
| <i>py-GC/MS quantification techniques<sup>81</sup></i>                                                                                                                                    |
| <b>raman spectroscopy</b>                                                                                                                                                                 |
| <i>acquisition parameters (i.e. laser wavelength, hole diameter, spectral resolution, laser intensity, number of accumulations, time of spectral acquisition)<sup>1,33,83–87</sup></i>    |
| <i>pre-processing parameters (i.e. spike filter, smoothing, baseline correction, data transformation)<sup>24,84,87,88</sup></i>                                                           |
| <i>spectral matching parameters (i.e. spectral library source, range of spectral wavelengths used to match, match threshold, matching procedure)<sup>1,17,33,40,83–87,89</sup></i>        |
| <b>Fourier-transform infrared spectroscopy (FTIR)</b>                                                                                                                                     |
| <i>acquisition parameters (i.e. mode of spectra collection, accessories, crystal type, background recording, spectral range, spectral resolution, number of scans)<sup>33,34,75</sup></i> |
| <i>pre-processing parameters (i.e. fourier-transformation (ft) parameters, smoothing, baseline correction, data transformation)<sup>31</sup></i>                                          |
| <i>matching parameters (i.e. FTIR spectral library source, match threshold, matching procedure, range of spectra used to match)<sup>2,17,34,84</sup></i>                                  |
| <b>differential scanning calorimetry (DSC)</b>                                                                                                                                            |
| <i>acquisition parameters (i.e. temperature, time, number of cycles)<sup>90</sup></i>                                                                                                     |
| <i>matching parameters (i.e. parameters assessed, reference library source, comparison technique)<sup>90</sup></i>                                                                        |
| <b>Microplastic Categorization</b>                                                                                                                                                        |
| <i>shape, size, texture, color, and polymer category definitions<sup>91–93</sup></i>                                                                                                      |
| <b>Microplastic Quantification</b>                                                                                                                                                        |
| <i>units (e.g. kg, count, mm)<sup>9,94</sup></i>                                                                                                                                          |
| <i>size dimensions (e.g. feret minimum or maximum)<sup>31</sup></i>                                                                                                                       |
| <i>quantification techniques<sup>31</sup></i>                                                                                                                                             |
| <b>Toxicology Considerations</b>                                                                                                                                                          |
| <i>dosed plastic age, polymer, size, color, and shapes<sup>95–104</sup></i>                                                                                                               |
| <i>animal husbandry<sup>105,106</sup></i>                                                                                                                                                 |
| <i>exposure concentration, media, and time<sup>106–112</sup></i>                                                                                                                          |
| <i>effects evaluation metrics (e.g. what markers were evaluated?)*</i>                                                                                                                    |
| <i>biota metrics (e.g. which tissues were analyzed?)*</i>                                                                                                                                 |

## References:

1. B.E. Oßmann, G. Sarau, H. Holtmannspötter, M. Pischetsrieder, S.H. Christiansen, W. Dicke. "Small-sized microplastics and pigmented particles in bottled mineral water". *Water Res.* 2018. 141: 307–316.
2. S. Primpke, C. Lorenz, R. Rascher-Friesenhausen, G. Gerdt. "An automated approach for microplastics analysis using focal plane array (FPA) FTIR microscopy and image analysis". *Anal. Methods. Royal Society of Chemistry*, 2017. 9(9): 1499–1511.
3. R. Hurley, J. Woodward, J.J. Rothwell. "Microplastic contamination of river beds significantly reduced by catchment-wide flooding". *Nat. Geosci.* 2018. 11(4): 251–257.
4. M. Kedzierski, J. Villain, M. Falcou-Préfol, M.E. Kerros, M. Henry, M.L. Pedrotti, et al. "Microplastics in Mediterranean Sea: A protocol to robustly assess contamination characteristics". *PLoS One.* 2019. 14(2): e0212088.
5. M. Haave, C. Lorenz, S. Primpke, G. Gerdt. "Different stories told by small and large microplastics in sediment - first report of microplastic concentrations in an urban recipient in Norway". *Mar. Pollut. Bull.* 2019. 141: 501–513.
6. R.N. Cable, D. Beletsky, R. Beletsky, K. Wigginton, B.W. Locke, M.B. Duhaime. "Distribution and Modeled Transport of Plastic Pollution in the Great Lakes, the World's Largest Freshwater Resource". *Front. Environ. Sci. Eng. China.* 2017. 5: 45.
7. J.P.G.L. Frias, P. Sobral, A.M. Ferreira. "Organic pollutants in microplastics from two beaches of the Portuguese coast". *Mar. Pollut. Bull. Elsevier*, 2010. 60(11): 1988–1992.
8. K.M. Martin, E.A. Hasenmueller, J.R. White, L.G. Chambers, J.L. Conkle. "Sampling, Sorting, and Characterizing Microplastics in Aquatic Environments with High Suspended Sediment Loads and Large Floating Debris". *J. Vis. Exp. jove.com*, 2018. (137).
9. A. Dehaut, L. Hermabessiere, G. Duflos. "Current frontiers and recommendations for the study of microplastics in seafood". *Trends Anal. Chem.* 2019. 116: 346–359.
10. K. Enders, R. Lenz, S. Beer, C.A. Stedmon. "Extraction of microplastic from biota: recommended acidic digestion destroys common plastic polymers". *ICES J. Mar. Sci. Oxford University Press*, 2017. 74(1): 326–331.
11. E. Hendrickson, E.C. Minor, K. Schreiner. "Microplastic Abundance and Composition in Western Lake Superior As Determined via Microscopy, Pyro-GC/MS, and FTIR". *Environ. Sci. Technol. ACS Publications*, 2018. 52(4): 1787–1796.
12. R.E. McNeish, L.H. Kim, H.A. Barrett, S.A. Mason, J.J. Kelly, T.J. Hoellein. "Microplastic in riverine fish is connected to species traits". *Sci. Rep.* 2018. 8(1): 11639.
13. M. Liboiron, F. Liboiron, E. Wells, N. Richárd, A. Zahara, C. Mather, et al. "Low plastic ingestion rate in Atlantic cod (*Gadus morhua*) from Newfoundland destined for human consumption collected through citizen science methods". *Mar. Pollut. Bull.* 2016. 113(1–2): 428–437.
14. Y.K. Song, S.H. Hong, M. Jang, G.M. Han, M. Rani, J. Lee, et al. "A comparison of microscopic and spectroscopic identification methods for analysis of microplastics in environmental samples". *Mar. Pollut. Bull. Elsevier*, 2015. 93(1–2): 202–209.
15. H.A. Nel, T. Dalu, R.J. Wasserman, J.W. Hean. "Colour and size influences plastic microbead underestimation, regardless of sediment grain size". *Sci. Total Environ. Elsevier*, 2019. 655: 567–570.
16. L. Hermabessiere, C. Himber, B. Boricaud, M. Kazour, R. Amara, A.-L. Cassone, et al. "Optimization, performance, and application of a pyrolysis-GC/MS method for the identification of microplastics". *Anal. Bioanal. Chem. Springer*, 2018. 410(25): 6663–6676.
17. C. Lorenz, L. Roscher, M.S. Meyer, L. Hildebrandt, J. Prume, M.G.J. Löder, et al. "Spatial distribution of microplastics in sediments and surface waters of the southern North Sea".

- Environ. Pollut. 2019. 252: 1719–1729.
18. L.I. Devriese, M.D. van der Meulen, T. Maes, K. Bekaert, I. Paul-Pont, L. Frère, et al. “Microplastic contamination in brown shrimp (*Crangon crangon*, Linnaeus 1758) from coastal waters of the Southern North Sea and Channel area”. *Mar. Pollut. Bull.* 2015. 98(1–2): 179–187.
  19. G. Vandermeersch, L. Van Cauwenberghe, C.R. Janssen, A. Marques, K. Granby, G. Fait, et al. “A critical view on microplastic quantification in aquatic organisms”. *Environ. Res.* 2015. 143(Pt B): 46–55.
  20. S. Brander. “A guide for scientists investigating the occurrence of microplastics across different matrices”. *Appl. Spectrosc.* n.d.
  21. D.R. Helsel. “Fabricating data: how substituting values for nondetects can ruin results, and what can be done about it”. *Chemosphere.* 2006. 65(11): 2434–2439.
  22. E. Hermesen, S.M. Mintenig, E. Besseling, A.A. Koelmans. “Quality Criteria for the Analysis of Microplastic in Biota Samples: A Critical Review”. *Environ. Sci. Technol.* American Chemical Society, 2018. 52(18): 10230–10240. 10.1021/acs.est.8b01611.
  23. R.Z. Miller, A.J.R. Watts, B.O. Winslow, T.S. Galloway, A.P.W. Barrows. “Mountains to the sea: River study of plastic and non-plastic microfiber pollution in the northeast {USA}”. *Mar. Pollut. Bull.* 2017.
  24. A. Dehaut, A.-L. Cassone, L. Frère, L. Hermabessiere, C. Himber, E. Rinnert, et al. “Microplastics in seafood: Benchmark protocol for their extraction and characterization”. *Environ. Pollut.* 2016. 215: 223–233.
  25. L. Van Cauwenberghe, C.R. Janssen. “Microplastics in bivalves cultured for human consumption”. *Environ. Pollut.* Elsevier, 2014. 193: 65–70.
  26. B. De Witte, L. Devriese, K. Bekaert, S. Hoffman, G. Vandermeersch, K. Cooreman, et al. “Quality assessment of the blue mussel (*Mytilus edulis*): comparison between commercial and wild types”. *Mar. Pollut. Bull.* 2014. 85(1): 146–155.
  27. K. Tanaka, H. Takada. “Microplastic fragments and microbeads in digestive tracts of planktivorous fish from urban coastal waters”. *Sci. Rep.* 2016. 6: 34351.
  28. C. Wesch, A.M. Elert, M. Wörner, U. Braun, R. Klein, M. Paulus. “Assuring quality in microplastic monitoring: About the value of clean-air devices as essentials for verified data”. *Sci. Rep. nature.com*, 2017. 7(1): 5424.
  29. M. Claessens, L. Van Cauwenberghe, M.B. Vandegehuchte, C.R. Janssen. “New techniques for the detection of microplastics in sediments and field collected organisms”. *Mar. Pollut. Bull.* Elsevier, 2013. 70(1–2): 227–233.
  30. M. Torre, N. Digka, A. Anastasopoulou, C. Tsangaris, C. Mytilineou. “Anthropogenic microfibres pollution in marine biota. A new and simple methodology to minimize airborne contamination”. *Mar. Pollut. Bull.* Elsevier, 2016. 113(1–2): 55–61.
  31. W. Cowger. “Review of Data Processing and Interpretation Techniques for Microplastics with Future Outlook”. *Appl. Spectrosc.* n.d.
  32. S. Primpke, P.A. Dias, G. Gerdt. “Automated identification and quantification of microfibres and microplastics”. *Anal. Methods.* pubs.rsc.org, 2019.
  33. L. Cabernard, L. Roscher, C. Lorenz, G. Gerdt, S. Primpke. “Comparison of Raman and Fourier Transform Infrared Spectroscopy for the Quantification of Microplastics in the Aquatic Environment”. *Environ. Sci. Technol.* 2018.
  34. S. Primpke, M. Wirth, C. Lorenz, G. Gerdt. “Reference database design for the automated analysis of microplastic samples based on Fourier transform infrared (FTIR) spectroscopy”. *Anal. Bioanal. Chem.* 2018.
  35. A. Bagaev, A. Mizyuk, L. Khatmullina, I. Isachenko, I. Chubarenko. “Anthropogenic fibres in the Baltic Sea water column: Field data, laboratory and numerical testing of their motion”. *Sci. Total Environ.* 2017. 599–600: 560–571.
  36. L.B. Spear, D.G. Ainley, C.A. Ribic. “Incidence of plastic in seabirds from the tropical

- pacific, 1984--1991: Relation with distribution of species, sex, age, season, year and body weight". *Mar. Environ. Res.* 1995. 40(2): 123–146.
37. P.K. Cheung, L.T.O. Cheung, L. Fok. "Seasonal variation in the abundance of marine plastic debris in the estuary of a subtropical macro-scale drainage basin in South China". *Sci. Total Environ.* 2016. 562: 658–665.
  38. G.L. Lattin, C.J. Moore, A.F. Zellers, S.L. Moore, S.B. Weisberg. "A comparison of neustonic plastic and zooplankton at different depths near the southern California shore". *Mar. Pollut. Bull. Elsevier*, 2004. 49(4): 291–294.
  39. M.A. Browne, T.S. Galloway, R.C. Thompson. "Spatial patterns of plastic debris along Estuarine shorelines". *Environ. Sci. Technol.* 2010. 44(9): 3404–3409.
  40. S.D.A. Smith, A. Markic. "Estimates of marine debris accumulation on beaches are strongly affected by the temporal scale of sampling". *PLoS One.* 2013. 8(12): e83694.
  41. H.A. Leslie, S.H. Brandsma, M.J.M. van Velzen, A.D. Vethaak. "Microplastics en route: Field measurements in the Dutch river delta and Amsterdam canals, wastewater treatment plants, North Sea sediments and biota". *Environ. Int.* 2017. 101: 133–142.
  42. K.A. Willis, R. Eriksen, C. Wilcox, B.D. Hardesty. "Microplastic Distribution at Different Sediment Depths in an Urban Estuary". *Front. Mar. Sci.* 2017. 4: 419.
  43. V. Hidalgo-Ruz, L. Gutow, R.C. Thompson, M. Thiel. "Microplastics in the marine environment: a review of the methods used for identification and quantification". *Environ. Sci. Technol.* 2012. 46(6): 3060–3075.
  44. "Interim Report of the Working Group on Marine Litter ({WGML})". n.d.
  45. G.A. Covernton, C.M. Pearce, H.J. Gurney-Smith, S.G. Chastain, P.S. Ross, J.F. Dower, et al. "Size and shape matter: A preliminary analysis of microplastic sampling technique in seawater studies with implications for ecological risk assessment". *Sci. Total Environ.* 2019. 667: 124–132.
  46. A.L. Lusher, A. Burke, I. O'Connor, R. Officer. "Microplastic pollution in the Northeast Atlantic Ocean: Validated and opportunistic sampling". *Mar. Pollut. Bull. Elsevier Ltd*, 2014. 88(1–2): 325–333. 10.1016/j.marpolbul.2014.08.023.
  47. J. Reisser, B. Slat, K. Noble, K. du Plessis, M. Epp, M. Proietti, et al. "The vertical distribution of buoyant plastics at sea: an observational study in the North Atlantic Gyre". *Biogeosciences; Katlenburg-Lindau. Copernicus GmbH, Katlenburg-Lindau, Germany, Katlenburg-Lindau*, 2015. 12(4): 1249.
  48. K. Enders, R. Lenz, C.A. Stedmon, T.G. Nielsen. "Abundance, size and polymer composition of marine microplastics  $\geq 10\mu\text{m}$  in the Atlantic Ocean and their modelled vertical distribution". *Mar. Pollut. Bull.* 2015. 100(1): 70–81. 10.1016/j.marpolbul.2015.09.027.
  49. B.D. Hardesty, J. Harari, A. Isobe, L. Lebreton, N. Maximenko, J. Potemra, et al. "Using Numerical Model Simulations to Improve the Understanding of Micro-plastic Distribution and Pathways in the Marine Environment". *Front. Mar. Sci.* 2017. 4: 30.
  50. S. Iwasaki, A. Isobe, S. Kako, K. Uchida, T. Tokai. "Fate of microplastics and mesoplastics carried by surface currents and wind waves: A numerical model approach in the Sea of Japan". *Mar. Pollut. Bull.* 2017. 121(1–2): 85–96.
  51. T. Kukulka, K.L. Law, G. Proskurowski. "Evidence for the Influence of Surface Heat Fluxes on Turbulent Mixing of Microplastic Marine Debris". *J. Phys. Ocean. American Meteorological Society*, 2016. 46(3): 809–815.
  52. L. Frère, I. Paul-Pont, E. Rinnert, S. Petton, J. Jaffré, I. Bihannic, et al. "Influence of environmental and anthropogenic factors on the composition, concentration and spatial distribution of microplastics: A case study of the Bay of Brest (Brittany, France)". *Environ. Pollut.* 2017. 225: 211–222.
  53. E.M. Crichton, M. Noël, E.A. Gies, P.S. Ross. "A novel, density-independent and {FTIR-compatible} approach for the rapid extraction of microplastics from aquatic sediments".



- Anal. Methods. Royal Society of Chemistry, 2017. 9(9): 1419–1428.
54. W. Courtene-Jones, B. Quinn, F. Murphy, S.F. Gary, B.E. Narayanaswamy. “Optimisation of enzymatic digestion and validation of specimen preservation methods for the analysis of ingested microplastics”. *Anal. Methods*. The Royal Society of Chemistry, 2017. 9(9): 1437–1445.
  55. J. Wagner, Z.-M. Wang, S. Ghosal, C. Rochman, M. Gassel, S. Wall. “Novel method for the extraction and identification of microplastics in ocean trawl and fish gut matrices”. *Anal. Methods*. The Royal Society of Chemistry, 2017. 9(9): 1479–1490.
  56. J.H. Dekiff, D. Remy, J. Klasmeier, E. Fries. “Occurrence and spatial distribution of microplastics in sediments from Norderney”. *Environ. Pollut. Elsevier*, 2014. 186: 248–256.
  57. D.S. Vicentini, D.J. Nogueira, S.P. Melegari, M. Arl, J.S. Köerich, L. Cruz, et al. “Toxicological Evaluation and Quantification of Ingested {Metal-Core} Nanoplastic by *Daphnia magna* Through Fluorescence and Inductively Coupled {Plasma-Mass} Spectrometric Methods”. *Environ. Toxicol. Chem. Wiley Online Library*, 2019. 38(10): 2101–2110.
  58. L. Wang, J. Zhang, S. Hou, H. Sun. “A Simple Method for Quantifying Polycarbonate and Polyethylene Terephthalate Microplastics in Environmental Samples by Liquid Chromatography–Tandem Mass Spectrometry”. *Environ. Sci. Technol. Lett.* 2017. 4(12): 530–534. 10.1021/acs.estlett.7b00454.
  59. S. Lu, R. Qu, J. Forcada. “Preparation of magnetic polymeric composite nanoparticles by seeded emulsion polymerization”. *Mater. Lett.* 2009. 63(9–10): 770–772. 10.1016/j.matlet.2008.12.045.
  60. E.G. Karakolis, B. Nguyen, J.B. You, C.M. Rochman, D. Sinton. “Fluorescent Dyes for Visualizing Microplastic Particles and Fibers in {Laboratory-Based} Studies”. *Environ. Sci. Technol. Lett. ACS Publications*, 2019.
  61. K.J. Wiggan, E.B. Holland. “Validation and application of cost and time effective methods for the detection of 3--500  $\mu\text{m}$  sized microplastics in the urban marine and estuarine environments surrounding Long Beach, California”. *Mar. Pollut. Bull.* 2019. 143: 152–162.
  62. T. Maes, R. Jessop, N. Wellner, K. Haupt, A.G. Mayes. “A rapid-screening approach to detect and quantify microplastics based on fluorescent tagging with Nile Red”. *Sci. Rep.* 2017. 7: 44501.
  63. T. Mani, S. Primpke, C. Lorenz, G. Gerdts, P. Burkhardt-Holm. “Microplastic Pollution in Benthic Midstream Sediments of the Rhine River”. *Environ. Sci. Technol.* 2019. 53(10): 6053–6062.
  64. N.P. Ivleva, A.C. Wiesheu, R. Niessner. “Microplastic in Aquatic Ecosystems”. *Angew. Chem. Int. Ed Engl. Wiley Online Library*, 2017. 56(7): 1720–1739.
  65. H.K. Imhof, J. Schmid, R. Niessner, N.P. Ivleva, C. Laforsch. “A novel, highly efficient method for the separation and quantification of plastic particles in sediments of aquatic environments: Novel plastic particle separation method”. *Limnol. Ocean. Methods.* 2012. 10(7): 524–537.
  66. R.C. Thompson, Y. Olsen, R.P. Mitchell, A. Davis, S.J. Rowland, A.W.G. John, et al. “Lost at sea: where is all the plastic?” *Science (80-. )*. 2004. 304(5672): 838.
  67. C.C. Wessel, G.R. Lockridge, D. Battiste, J. Cebrian. “Abundance and characteristics of microplastics in beach sediments: Insights into microplastic accumulation in northern Gulf of Mexico estuaries”. *Mar. Pollut. Bull.* 2016. 109(1): 178–183.
  68. J. Masura, J.E. Baker, G.D. Foster, C. Arthur, C. Herring. “Laboratory methods for the analysis of microplastics in the marine environment: recommendations for quantifying synthetic particles in waters and sediments”. *repository.library.noaa.gov*, 2015.
  69. R.L. Coppock, M. Cole, P.K. Lindeque, A.M. Queirós, T.S. Galloway. “A small-scale, portable method for extracting microplastics from marine sediments”. *Environ. Pollut.*

2017. 230: 829–837.
70. A. Lusher. "Isolation and Extraction of Microplastics from Environmental Samples: An Evaluation of Practical Approaches and Recommendations for Further Harmonisation". *Appl. Spectrosc.* n.d.
  71. K. Munno, P.A. Helm, D.A. Jackson, C. Rochman, A. Sims. "Impacts of temperature and selected chemical digestion methods on microplastic particles". *Environ. Toxicol. Chem.* 2018. 37(1): 91–98.
  72. C.J. Thiele, M.D. Hudson, A.E. Russell. "Evaluation of existing methods to extract microplastics from bivalve tissue: Adapted {KOH} digestion protocol improves filtration at single-digit pore size". *Mar. Pollut. Bull. Elsevier*, 2019. 142: 384–393.
  73. L.W. von Friesen, M.E. Granberg, M. Hassellöv, G.W. Gabrielsen, K. Magnusson. "An efficient and gentle enzymatic digestion protocol for the extraction of microplastics from bivalve tissue". *Mar. Pollut. Bull. Elsevier*, 2019. 142: 129–134.
  74. B.E. Oßmann, G. Sarau, S.W. Schmitt, H. Holtmannspötter, S.H. Christiansen, W. Dicke. "Development of an optimal filter substrate for the identification of small microplastic particles in food by micro-Raman spectroscopy". *Anal. Bioanal. Chem.* 2017. 409(16): 4099–4109.
  75. M.G.J. Löder, G. Gerdts. "Methodology Used for the Detection and Identification of {Microplastics---A} Critical Appraisal". In: M. Bergmann, L. Gutow, M. Klages, editors. *Marine Anthropogenic Litter*. Springer International Publishing, Cham, 2015. Pp. 201–227.
  76. E. Fries, J.H. Dekiff, J. Willmeyer, M.-T. Nuelle, M. Ebert, D. Remy. "Identification of polymer types and additives in marine microplastic particles using {pyrolysis-GC/MS} and scanning electron microscopy". *Environ. Sci. Process. Impacts. pubs.rsc.org*, 2013. 15(10): 1949–1956.
  77. F. Murray, P.R. Cowie. "Plastic contamination in the decapod crustacean *Nephrops norvegicus* (Linnaeus, 1758)". *Mar. Pollut. Bull. Elsevier*, 2011. 62(6): 1207–1217.
  78. Rowshyra A. Castañeda, Suncica Avlijas, M. Anouk Simard, Anthony Ricciardia. "Microplastic pollution discovered in St. Lawrence River sediments". *NRC Press*. 2014. 88(1–2): 5–6.
  79. G. Emi-Cassola, M.I. Gibson, R.C. Thompson, J.A. Christie-Oleza. "Lost, but Found with Nile Red: A Novel Method for Detecting and Quantifying Small Microplastics (1 mm to 20  $\mu\text{m}$ ) in Environmental Samples". *Environ. Sci. Technol.* 2017. 51(23): 13641–13648.
  80. M. Zbyszewski, P.L. Corcoran, A. Hockin. "Comparison of the distribution and degradation of plastic debris along shorelines of the Great Lakes, North America". *J. Gt. Lakes Res.* 2014. 40(2): 288–299.
  81. M. Fischer, B.M. Scholz-Böttcher. "Simultaneous Trace Identification and Quantification of Common Types of Microplastics in Environmental Samples by {Pyrolysis-Gas} {Chromatography--Mass} Spectrometry". *Environ. Sci. Technol. American Chemical Society*, 2017. 51(9): 5052–5060.
  82. H. van Den Dool, P. Dec. Kratz. "A generalization of the retention index system including linear temperature programmed gas---liquid partition chromatography". *J. Chromatogr. A.* 1963. 11: 463–471.
  83. K. Munno, H. De Frond, B. O'Donnell, C.M. Rochman. "Increasing the Accessibility for Characterizing Microplastics: Introducing New {Application-Based} and Spectral Libraries of Plastic Particles ({SLoPP} and {SLoPP-E})". *Anal. Chem.* 2020.
  84. R. Lenz, K. Enders, C.A. Stedmon, D.M.A. Mackenzie, T.G. Nielsen. "A critical assessment of visual identification of marine microplastic using Raman spectroscopy for analysis improvement". *Mar. Pollut. Bull.* 2015. 100(1): 82–91.
  85. A. Karami, A. Golieskardi, C.K. Choo, V. Larat, S. Karbalaei, B. Salamatinia. "Microplastic and mesoplastic contamination in canned sardines and sprats". *Sci. Total Environ.*

- Elsevier, 2018. 612: 1380–1386.
86. A. K ppler, D. Fischer, S. Oberbeckmann, G. Schernewski, M. Labrenz, K.-J. Eichhorn, et al. "Analysis of environmental microplastics by vibrational microspectroscopy: {FTIR}, Raman or both?" *Anal. Bioanal. Chem.* 2016. 408(29): 8377–8391.
  87. F. Collard, B. Gilbert, G. Eppe, E. Parmentier, K. Das. "Detection of Anthropogenic Particles in Fish Stomachs: An Isolation Method Adapted to Identification by Raman Spectroscopy". *Arch. Environ. Contam. Toxicol.* Springer, 2015. 69(3): 331–339.
  88. S. Ghosal, M. Chen, J. Wagner, Z.-M. Wang, S. Wall. "Molecular identification of polymers and anthropogenic particles extracted from oceanic water and fish stomach--A Raman micro-spectroscopy study". *Environ. Pollut.* Elsevier, 2017.
  89. A. Karami, N. Romano, T. Galloway, H. Hamzah. "Virgin microplastics cause toxicity and modulate the impacts of phenanthrene on biomarker responses in African catfish (*Clarias gariepinus*)". *Environ. Res.* 2016. 151: 58–70.
  90. S. Primpke. "Critical assessment of analytical methods for the harmonized and cost efficient analysis of microplastics". *Appl. Spectrosc.* n.d.
  91. C.M. Rochman, C. Brookson, J. Bikker, N. Djuric, A. Earn, K. Bucci, et al. "Rethinking microplastics as a diverse contaminant suite". *Environ. Toxicol. Chem.* Wiley Online Library, 2019. 38(4): 703–711.
  92. P.L. Corcoran, M.C. Biesinger, M. Grifi. "Plastics and beaches: a degrading relationship". *Mar. Pollut. Bull.* 2009. 58(1): 80–84.
  93. F. Liboiron, J. Ammendolia, J. Saturno, J. Melvin, A. Zahara, N. Rich rd, et al. "A zero percent plastic ingestion rate by silver hake (*Merluccius bilinearis*) from the south coast of Newfoundland, Canada". *Mar. Pollut. Bull.* 2018. 131: 267–275.
  94. S. M., van A. N., V. J. "Quantification of microplastic mass and removal rates at wastewater treatment plants applying Focal Plane Array (FPA)-based Fourier Transform Infrared (FT-IR) imaging". *Water Res.* 2018. 142: 1–9.
  95. M. Walpitagama, M. Carve, A.M. Douek, C. Trestrail, Y. Bai, J. Kaslin, et al. "Additives migrating from 3D-printed plastic induce developmental toxicity and neuro-behavioural alterations in early life zebrafish (*Danio rerio*)". *Aquat. Toxicol.* Elsevier, 2019. 213: 105227.
  96. F.-F. Liu, G.-Z. Liu, Z.-L. Zhu, S.-C. Wang, F.-F. Zhao. "Interactions between microplastics and phthalate esters as affected by microplastics characteristics and solution chemistry". *Chemosphere.* Elsevier, 2019. 214: 688–694.
  97. T. H ffer, T. Hofmann. "Sorption of non-polar organic compounds by micro-sized plastic particles in aqueous solution". *Environ. Pollut.* Elsevier, 2016. 214: 194–201.
  98. N.B. Hartmann, S. Rist, J. Bodin, L.H. Jensen, S.N. Schmidt, P. Mayer, et al. "Microplastics as vectors for environmental contaminants: Exploring sorption, desorption, and transfer to biota". *Integr. Environ. Assess. Manag.* 2017. 13(3): 488–493.
  99. C.-B. Jeong, E.-J. Won, H.-M. Kang, M.-C. Lee, D.-S. Hwang, U.-K. Hwang, et al. "Microplastic {Size-Dependent} Toxicity, Oxidative Stress Induction, and {p-JNK} and p-p38 Activation in the Monogonont Rotifer (*Brachionus koreanus*)". *Environ. Sci. Technol.* ACS Publications, 2016. 50(16): 8849–8857.
  100. A.D. Gray, J.E. Weinstein. "Size-and shape-dependent effects of microplastic particles on adult daggerblade grass shrimp (*Palaemonetes pugio*)". *Environ. Toxicol. Chem.* Wiley Online Library, 2017. 36(11): 3074–3080.
  101. I. Velzeboer, C.J.A.F. Kwadijk, A.A. Koelmans. "Strong sorption of {PCBs} to nanoplastics, microplastics, carbon nanotubes, and fullerenes". *Environ. Sci. Technol.* 2014. 48(9): 4869–4876.
  102. M.A. Pascall, M.E. Zabik, M.J. Zabik, R.J. Hernandez. "Uptake of polychlorinated biphenyls ({PCBs}) from an aqueous medium by polyethylene, polyvinyl chloride, and polystyrene films". *J. Agric. Food Chem.* 2005. 53(1): 164–169.

103. C.M. Rochman, E. Hoh, B.T. Hentschel, S. Kaye. "Long-term field measurement of sorption of organic contaminants to five types of plastic pellets: implications for plastic marine debris". *Environ. Sci. Technol.* 2013. 47(3): 1646–1654.
104. Q.A. Schuyler, C. Wilcox, K. Townsend, B.D. Hardesty, N.J. Marshall. "Mistaken identity? Visual similarities of marine debris to natural prey items of sea turtles". *BMC Ecol.* 2014. 14: 14.
105. L.I. Devriese, B. De Witte, A.D. Vethaak, K. Hostens, H.A. Leslie. "Bioaccumulation of {PCBs} from microplastics in Norway lobster (*Nephrops norvegicus*): An experimental study". *Chemosphere.* 2017. 186: 10–16.
106. S.N. Athey, S.D. Alotra, C.A. Gordon, B. Monteleone, P. Seaton, A.L. Andrady, et al. "Trophic transfer of microplastics in an estuarine food chain and the effects of a sorbed legacy pollutant". *Limnol. Ocean. Wiley Online Library*, 2020. 5(1): 154–162.
107. S.L. Wright, D. Rowe, R.C. Thompson, T.S. Galloway. "Microplastic ingestion decreases energy reserves in marine worms". *Curr. Biol. Elsevier*, 2013. 23(23): R1031--3.
108. A.J.R. Watts, M.A. Urbina, S. Corr, C. Lewis, T.S. Galloway. "Ingestion of Plastic Microfibers by the Crab *Carcinus maenas* and Its Effect on Food Consumption and Energy Balance". *Environ. Sci. Technol. ACS Publications*, 2015. 49(24): 14597–14604.
109. C. Wu, K. Zhang, X. Huang, J. Liu. "Sorption of pharmaceuticals and personal care products to polyethylene debris". *Environ. Sci. Pollut. Res. Int. Springer*, 2016. 23(9): 8819–8826.
110. P. Wu, Z. Cai, H. Jin, Y. Tang. "Adsorption mechanisms of five bisphenol analogues on {PVC} microplastics". *Sci. Total Environ. Elsevier*, 2019. 650(Pt 1): 671–678.
111. P.B. Key, M.H. Fulton, G.I. Scott, S.L. Layman, E.F. Wirth. "Lethal and sublethal effects of malathion on three life stages of the grass shrimp, *Palaemonetes pugio*". *Aquat. Toxicol. Elsevier*, 1998. 40(4): 311–322.
112. C.M. Rochman, T. Kurobe, I. Flores, S.J. Teh. "Early warning signs of endocrine disruption in adult fish from the ingestion of polyethylene with and without sorbed chemical pollutants from the marine environment". *Sci. Total Environ. Elsevier*, 2014. 493: 656–661.
